# Supplementary material for: Circulating miRNA signatures of early pregnancy in cattle
Source: BMC Genomics. 2016 Mar 3;17:184. doi: 10.1186/s12864-016-2529-1 (PMC4778341; doi:10.1186/s12864-016-2529-1)
Supplement: Additional file 2: — Small-RNA sequencing data. Normalised expression data (reads per million mapped) and differential expression analysis results for bovine plasma miRNAs, generated using small-RNA sequencing. (XLSX 102 kb) [file 12864_2016_2529_MOESM2_ESM.xlsx]

## Sheet: Dataset
Normalised expression levels of 178 miRNAs in pooled plasma samples from pregnant (Day 16; P16, Day 24; P24) and non-pregnant (Days 0, 8, 16 of the oestrous cycle; NP0, NP8, NP16) heifers determined using small-RNA sequencing. This data was used in the differential expression analysis described in the manuscript.
The sample ids have the format "group id_cow id_sequencing sample id", for example "NP0_16_010"
miRNA	NP0_16_010	NP0_18_021	NP0_20_034	NP0_21_030	NP0_22_040	NP0_25_033	NP0_34_046	NP0_35_016	NP8_16_047	NP8_18_041	NP8_20_037	NP8_21_023	NP8_22_028	NP8_25_017	NP8_34_027	NP8_35_011	NP16_16_024	NP16_18_031	NP16_20_042	NP16_21_048	NP16_22_052	NP16_25_036	NP16_34_012	NP16_35_018	P16_10_032	P16_11_035	P16_12_019	P16_14_014	P16_17_025	P16_24_013	P16_26_043	P16_29_049	P16_31_045	P16_32_053	P24_10_054	P24_11_056	P24_12_029	P24_14_026	P24_17_020	P24_24_055	P24_26_050	P24_28_038	P24_29_015	P24_31_051	P24_32_044
bta-let-7a-3p	82.88	53.57	59.16	69.47	98.79	103.61	80.58	122.69	50.49	60	58.05	84.16	99.6	90.4	97.49	99.54	56.63	58.89	70.32	49.39	86.86	57.35	79.64	87.21	62.36	54.53	81.74	83.06	84.3	67.47	67.36	60.07	87.21	67.58	89.04	52.91	79.9	64.78	86.04	117.9	54	55.92	67.38	66.53	64.78
bta-let-7a-5p	1032.53	326.26	877.02	1772.3	1501.26	1227.14	1173.64	802.9	642.88	926.26	555.4	945.24	2236.52	1486.66	771.76	2338.06	789.28	550.97	751.79	661.21	2141.26	830.69	1319.88	876.93	859.39	792.42	721.97	773.7	615.66	1085.52	841.09	805.29	1045.92	1601.72	1587.71	1221.41	1047.89	539.22	619.51	1123.06	1447.77	588.84	678.29	974.01	1196.16
bta-let-7b	565.99	394.37	667.21	912.97	850	770.31	910.99	626.08	533.36	900.83	494.55	609.87	1154.18	884.83	559.54	1359.27	497.36	819.4	626.46	455.21	1516.57	605.72	839.79	553.35	754.91	671.41	612.01	537.47	573.51	708.91	565.37	650.09	1120.51	1094.85	1082.63	701.02	1073.46	495.46	654.53	1120.69	912.7	448.49	360.3	916.35	885.48
bta-let-7c	174.24	107.71	197.38	239.29	341.55	240.76	339.85	205.99	197.21	317.1	134.06	245.01	357.59	274.28	159.87	440.45	139.59	218.89	186.79	130.56	562.43	182.95	269.68	180.74	223.89	192.87	184.05	134.82	149.76	180.92	168.4	195.17	306.26	467.13	431.87	216.22	243.91	105.09	210.73	718.65	252.51	122.15	95.78	260.8	285.88
bta-let-7d	439.05	255.03	305.76	921.08	633.7	500.92	564.98	278.76	189.43	348.49	216.25	336.01	1274.55	744.87	449.83	1205.4	287.09	157.96	245.3	212.96	767.16	308.78	458.23	336.82	336.33	277.48	339.89	293.11	293.14	578.34	370.93	233.3	362.64	703.41	816.24	593.74	416.62	168.83	330.89	373.56	601.24	255.7	360.3	276.77	409.66
bta-let-7f	3118.61	699.83	1734.89	6892.56	4382.52	2967.45	3034.06	2103.17	1193.33	1698.55	1027.81	2007.11	9532.74	5747.61	2663.24	10092.6	1805.06	986.55	1407.41	1334.59	5377.86	1783.04	3822.57	2456.68	2055.78	1935.66	2132.96	2064.11	1280.82	4074.22	1766.84	1425.24	1890.71	4167.72	5066.13	4445.17	3078.26	1102.56	1724.18	2296.54	3899.51	1410.03	2287.68	1818.51	3113.5
bta-let-7g	968.25	722.91	1386.62	2184.5	2050.69	2011.96	1746.01	1875.83	1169.6	1471.45	1229.9	2137.63	2656.63	2456.73	1804.33	2746.43	1334.04	1426.54	1801.3	1163.58	1974.39	1545.77	1903.69	1905.44	2536.05	1494.46	1808.62	1616.92	1276.99	1422.85	1605.4	1459.07	1986.73	2165.09	3423.26	1716.43	1730.3	1312.39	1539.42	3081.03	1687.35	1186.52	1569.86	1419.32	2357.32
bta-let-7i	1178.88	972.81	1349.58	2575.08	2028.68	1601.84	1728.78	1260.58	875.4	1547.95	1202.97	1496.79	2776.52	2142.58	1792.11	3074.03	1245.81	1136.33	1401.5	978.92	1929.25	1413.43	1844.05	1454.64	1840.84	1255.66	1535.71	1444.79	1151.81	1664.86	1473.6	1165.29	1618.22	1938.01	2971.36	1933.56	1293.11	807.63	1570.51	3086.52	1580.11	1039.72	1692.93	1098.2	1839.59
bta-miR-100	426.52	602.66	206.08	287.34	379.47	315.36	358.61	624.88	282.44	250.74	249.97	361.01	274.32	351.61	414.41	294.06	361.72	314.21	209.68	256.39	155.32	183.18	320.43	384.03	204.98	176.48	337.52	371.05	374.89	322.23	158.52	147.2	240.49	188.96	153.85	157.83	321.17	306.31	417.84	524.08	147.17	244.48	248.93	206.69	215.86
bta-miR-101	3770.72	7540.85	13372.8	5081.27	11131.5	9897.39	9200.9	6507.38	6403.19	12627.1	10073	7704.18	8289.69	10065.5	5997.62	7046.64	7586.36	14309.2	12142.8	8044.28	11121.5	10625.8	10556.4	7850.6	8322.28	6109.72	7698.57	10570.9	6482.66	5326.56	12342	9167.94	6543.34	7768	10890.6	6588.02	6816	6854.5	7091.47	13414.1	5572.03	5465.9	11427.8	6515.58	8979.09
bta-miR-103	3874.21	7900.46	5598.69	7750.72	10355.3	7991.31	8480.6	9061.02	4070.63	5562.35	6274.18	7745.2	7899.44	8568.22	8589.39	5527.12	8886.17	5026.86	6964.13	5313.79	5956.33	5863.38	6451.95	5426.7	6425.38	3950.17	5643.93	8042.47	6813.48	6328.83	4756.02	4291.93	6083.51	4561.05	7767.63	4063.64	6109.59	5888.37	6941.42	7060.9	4673.02	5895.43	8427.89	5022.63	6590.89
bta-miR-106b	196.48	458.77	628.18	362.41	560.66	619.98	515.47	296.5	369.94	698.37	471.41	583.59	586.19	526.12	394.03	462.51	441.61	677.27	458.49	419.96	579.33	617.33	682.35	415.91	533.68	400.24	507.33	590.43	450.89	436.69	609.15	511.71	479.5	643.66	717.8	449.59	436.4	447.57	388.25	922.11	381.43	322.84	489.5	373.46	674.58
bta-miR-107	1823.3	3827.99	2656.91	3561.58	4961.44	3805.01	4037.31	4407.82	1958.44	2585.67	3031.96	3722.21	3505.24	3955.51	4113.04	2337.88	4337.51	2352.49	3334.22	2559.23	2696.42	2806.43	3063.17	2558.02	3017.66	1838.02	2608.12	3853.16	3302.16	2988.03	2223.53	2038.23	2856.77	1981.54	3490.29	1814.05	2876.28	2893.54	3310.4	3293.39	2131.53	2840.29	4039.64	2350.75	3102.75
bta-miR-10a	3853.6	3570.11	3195.35	7700.16	5613.4	4781.6	4404.84	5449.18	3790.29	4607.68	5102.73	4989.37	6072.29	5451.54	5296.39	5647.45	5421.34	3993.16	5316.4	4081.21	4772	4345.24	4954.26	5154.54	6745.12	6111.07	5933.72	4484.52	4605.34	5192.96	4637.47	4525.64	5295.69	4774.34	6477.48	4748.98	6121.19	5782.94	4821.74	4690.36	4345.97	5363.43	5018.09	3769.19	6545.68
bta-miR-10b	18648.6	28751.8	18177.2	29904.1	34349.2	24312.6	30006.3	28459.9	15483.2	23636.2	20333.5	21050.8	14892.6	16827.3	27697.3	18564.1	26944.7	21000.4	23763	19025.3	24434.6	20432.1	24012.7	20043.5	16099.3	22217.3	19072.7	16848.7	21725.8	22891.5	19145.1	18511.4	36251.5	15058.6	14536.5	17120.5	24814.6	20573.1	26272.8	23159.3	14846.2	14972.4	17713.9	21605.6	17547.7
bta-miR-1246	175.86	414.6	172.77	543.81	244.16	1173.83	550.22	305.82	328.18	256.5	220.64	494.52	232.1	1535.58	672.71	254.13	397.71	220.76	202.85	399.61	184.84	872.72	561.59	156.08	491.89	458.26	566.4	792.66	284.2	748.18	526.75	146.17	1103.77	165.71	457.59	387.19	726.98	885.5	260.85	552.26	722.55	1022.98	160.38	909.25	256.38
bta-miR-125a	974.72	890.18	368.16	435.93	442.91	428.58	600.97	643.22	439.41	605.39	444.68	401.17	337.53	413.28	594.34	577.72	423.17	560.34	247.15	489.71	462.52	435.31	602.71	455.31	340.31	511.85	526.84	453.81	485.7	773.36	407.52	360.21	616.04	282.23	165.23	403.43	659.21	405.88	618	219.93	367.36	357.24	262.29	636.92	282.84
bta-miR-125b	272.08	500.37	176.25	122.93	207.64	192.15	219.6	394.53	177.66	219.74	200.89	202.08	198.74	231.02	250.78	259.24	130.38	259.74	92.84	152.65	122.37	114.46	198.93	232.16	142.62	128.67	266.06	195.01	225.76	299.07	113.39	85.49	162.09	124.62	92.01	136.67	231.25	166.07	267.79	140.14	110.66	116.81	117.5	180.08	119.37
bta-miR-126-3p	553.86	377.84	297.06	706.87	484.11	371.68	335.55	372.88	307.68	525.92	385.83	554.54	491.48	413.28	704.05	576.45	785.33	335.32	388.72	426.91	569.28	437.63	927.21	436.06	388.73	583.44	570.09	505.27	517.95	627.01	491.27	304.65	752.29	340.62	394.02	597.75	576.42	272.2	645.47	384.09	414.9	335.35	302.95	476.36	406.9
bta-miR-126-5p	6539.23	2521.79	3088.21	8026.68	4854.23	3226.85	3756.51	4223.18	3558.91	3902.35	3507.36	5404.42	3989.96	3218.07	6548.07	4339.04	7923.5	3697.85	3582.85	4480.08	5878.25	3549.37	6353.78	4220.17	3784.84	6451.94	4731.32	4464.66	3825.54	4845.22	4386	3110.85	7495.01	3194.79	3627.81	6320.9	5855.13	3629.84	6330.97	4903.61	3432.13	2903.2	2821.18	5176.98	3872.99
bta-miR-127	1564.56	1396.81	706.73	597.65	1064.44	679.69	670.48	729.83	488.57	719.43	806.97	621.83	604.15	691.92	812.51	753.83	631.68	487.49	763.6	491.69	767.38	679.79	801.63	674.54	632.85	573.23	733.05	603.67	767.34	807.93	448.16	496.54	887.66	704.76	605.25	426.96	753.88	602.27	1515.27	1003.98	421.74	549.85	614.24	666.19	707.94
bta-miR-128	1531.82	1557.24	2399.87	2946.76	3351.8	2643.99	2861.52	2326.6	2030.57	1793.12	2126.04	2981.19	3622.33	3096.67	2788.32	3076.58	1853.79	1878.28	2320.89	2288.44	2181.69	2475.36	3045.76	2585.69	3516.51	3233.36	3461.14	2913.35	2550.47	2628.87	2018.31	1971.6	2163.5	2165.63	2974.33	2699.18	2796.12	2639.26	2603.94	5638.72	2528.56	2471.82	2478.14	2058.02	2824.87
bta-miR-1296	32.34	25.93	28.34	46.12	37.69	43.52	42.44	27.06	28.47	35.76	32.92	37.38	43.15	47.79	53.92	57.24	38.63	28.6	33.22	27.55	35.3	41.33	61.12	47.52	37.81	57.75	52.47	37.62	46.3	40.28	39.97	31.37	48.74	38.39	49.22	43.79	33.49	38.59	41.66	61.25	39.55	37.9	42.88	29.27	52.1
bta-miR-1307	202.95	220.26	222.73	327.87	283.49	321.01	386.6	252.6	216	239.41	282.09	261.89	319.34	343.54	414.41	365.7	236.17	218.04	293.11	188.88	258.86	330.84	348.95	290.21	521.08	338.06	337.52	226.6	275.26	306.46	249.23	250.73	328.87	295.2	429.64	274.97	281.88	214.31	307.04	281.47	347.97	292.86	272.87	252.82	326.68
bta-miR-130a	303.21	325.41	358.46	402.94	590.63	458.53	441.96	389.42	277.5	343.33	407.97	435.56	403.08	451.7	552.33	265.98	469.7	259.57	490.79	292.88	357.27	371.7	433.04	296.52	391.06	265.39	368.9	455.92	449.93	393.39	351.84	253.19	505.93	297.91	390.56	257.82	446.42	417.94	394.59	558.34	310.7	392.75	388.71	386.77	476.92
bta-miR-130b	289.46	386.39	477.54	980.71	909.93	744.31	556.99	752.98	412.64	420.61	646.37	757.26	1364.59	1024.63	1053.26	1065.94	622.47	435.57	676.66	455.95	582.33	599.46	677.53	829.12	1093.23	818.88	1126.99	976.83	732.86	808.94	665.29	533.65	726.45	650.69	1281	816.71	908.66	831.75	906.62	1249.26	712.29	661.51	775.74	464.83	1021.94
bta-miR-133a	242.16	523.73	181.47	85.68	2309.36	876.56	273.42	101.34	74.59	156.76	67.63	96.13	24.26	667.38	22.26	2915.24	23.7	279.32	153.75	41.7	162.59	1179.41	28.52	61.95	29.19	85.29	25.31	23.17	162.86	67.8	28.07	59.25	63.72	53.26	426.67	39.96	36.39	53.41	139.48	1150.35	28.14	34.03	27.29	58.55	49.35
bta-miR-1343-3p	84.49	49.58	53.69	111.54	82.17	55.2	108.26	49.62	81.05	45.7	71.62	77.76	170.51	73.13	122.25	92.98	44.78	51.74	66.26	97.3	86.64	67.79	86.31	52.93	89.22	131.62	114.44	97.8	79.83	80.89	68.03	63.14	70.77	84.88	63.07	143.96	102.05	92.34	69.44	21.35	117.89	151.76	62.37	87.82	90.7
bta-miR-138	77.22	351.34	184.95	110.96	235.03	207.6	142.71	264.93	96.61	234.84	261.74	134.15	183.81	184.84	258.3	183.22	185.25	101.11	211.16	71.98	153.18	201.06	225.23	182.54	251.75	88.24	223.34	275.05	259.93	352.11	184.12	171.8	468.35	169.77	251.06	110.57	162.43	216.72	274.43	246.32	139.57	120.31	272.32	210.24	301.04
bta-miR-1388-3p	112.39	196.33	103.66	170.21	177.45	172.18	119.02	180.73	98.32	126.76	155.01	188.41	137.39	160.47	222.25	123.06	248.02	68.08	146.37	99.28	83.01	129.78	122.25	144.95	171.48	75.88	156.63	276.86	204.37	170.18	136.29	92.26	128.02	90.83	172.15	84.66	138.43	121.63	198.65	188.34	107.24	117.18	295.15	117.98	142.8
bta-miR-1388-5p	124.92	149.88	70.6	236.01	141.86	144.68	83.04	143.74	93.01	113.25	126.48	179.65	126.66	142.71	169.9	114.49	221.24	83.23	146.37	91.09	76.8	129.78	146.32	143.15	136.65	97.24	142.39	149.87	156.47	150.04	123.72	92.26	133.9	82.18	131.09	76.27	130.26	131.27	180.84	165.95	100.78	102.65	226.1	78.06	120.47
bta-miR-139	131.8	37.61	51.71	71.4	47.76	60.66	68.28	41.8	38.15	41.52	49.87	49.77	54.58	44.07	42.63	50.13	49.17	26.72	43.19	41.7	56.91	39.24	47.79	35.79	43.78	31.29	47.99	38.82	42.79	75.19	35.93	33.01	77.81	44.88	40.81	35.03	49.84	44.79	55.85	26.1	50.96	43.23	32.86	78.06	38.87
bta-miR-140	4538.85	10378.6	10151.3	9985.59	14727.2	11887.3	7462.89	10502.9	6772.75	11180.3	17014.5	11000.7	13620.7	12253.3	16803.6	11739.9	11570.1	7373.39	15634.7	7058.91	11685.7	11736.5	12244.1	12233.5	13565.2	6875.82	12761.3	14868.9	12773.7	14394.4	9828.41	6858.06	15381.7	10950.1	12821.6	6494.97	12798.8	12127.9	14294	14239.1	10143.9	11182.5	13096.8	13095	15716.1
bta-miR-141	696.17	1231.26	815.12	1591.67	1136.07	1131.25	812.26	1147.21	900.45	988.25	1459.32	1880.65	1365.52	1071.29	1857	732.87	2597.41	891.23	1173.92	1457.95	948.79	885.95	1045.75	605.67	978.8	655.43	1328.45	2182.07	2480.21	2303.29	1272.64	1096.2	828.34	837.49	963.9	679.31	1306.82	1273.46	2077.72	1876.11	962.9	1171.62	1730.24	730.06	1158.67
bta-miR-142-3p	260.36	278.39	197.13	772.1	392.81	335.14	285.41	484.75	203.66	182.39	300.84	515.02	981.34	624.27	706.87	716.09	345.03	188.76	282.59	222.14	217.57	322.94	494.91	590.64	615.94	384.93	641.28	670.18	438.12	412.19	292.34	184.72	323	333.32	817.72	492.1	320.11	212.24	665.7	624.04	332.76	368.46	847.58	170.32	443.56
bta-miR-142-5p	12281.2	14803.3	17447.6	23923.9	23018.7	23231.7	18829.3	26399.1	15142.2	15170.7	15208.1	30534.1	29240.4	25858.7	24698.3	24834	18350	18816	18816.5	16141.4	16625.2	18394.8	27426.6	28514.8	21389	17218.2	23298.8	20119.6	19532	19954.2	16968.7	17416	14255.3	16159.7	28418.2	18877.3	19739.5	17667.5	20422.7	35084.4	13836.9	19061.7	18124.9	12574.3	20438.4
bta-miR-143	32517	6746.7	4602.35	7542.69	8909.48	5672.28	6999.4	5365.28	4450.63	17400.9	5936.23	6783.51	3697.91	5096.05	6322.69	4098.95	13554.7	4988.73	5544.54	4688.57	6590	5944.87	3760.7	3968.76	5997.17	5820.29	5209.64	6329.55	7146.54	9997.91	5195.21	4874.16	14642.4	5185.25	4482.64	5110.98	8536.55	5679.23	10898.2	9595.45	3529.1	3552.75	6272.19	12634.6	6522.53
bta-miR-144	42.05	135.64	283.64	99.58	138.35	154.1	121.18	64.95	101.93	149.81	176.36	165.55	126.89	123.98	79.93	91.88	143.11	197.96	175.53	138.99	128.79	153.93	193.74	93.23	115.09	78.97	126.57	279.87	104.74	107.07	144.82	101.69	119.51	105.16	173.88	98.9	106.27	108.88	108.38	157.34	69.97	89.95	161.5	104.68	114.96
bta-miR-1468	1015.55	890.18	860.61	1595.34	1086.21	835.11	1147.5	774.63	861.35	1104.68	991.9	935.41	1184.51	1051.43	1316.89	1070.13	1238.35	1010.72	1041.94	1111.7	1565.14	1077.49	1357.29	854.38	867.02	1682.36	1163.38	714.42	1095.93	1056.32	1060.69	1101.53	1621.74	832.62	698.01	1345.67	1328.71	698.4	1381.52	768.63	1123.38	939.65	624.27	1235.7	802.22
bta-miR-146a	125.33	120.82	51.46	124.66	124.07	118.68	84.27	175.62	77.82	164.51	91.57	145.9	152.79	110.1	171.15	218.4	150.13	191.83	118.87	89.85	105.26	81.72	127.43	180.44	101.16	107.18	160.85	140.84	133.48	173.54	83.53	106.81	135.07	116.51	149.89	106.92	164.01	83.04	155.18	244.69	110.66	136.68	128.64	97.58	125.98
bta-miR-146b	19.41	28.49	28.84	31.84	63.44	31.84	47.36	32.48	33.22	48.88	35.51	28.62	32.19	38.58	28.53	31.54	44.78	83.23	38.95	29.78	37.87	43.18	41.49	47.82	42.79	35.73	38.5	36.41	31.61	28.2	47.15	29.11	46.1	24.87	48.23	29.56	34.28	32.04	44.38	103.07	31.94	25.02	23.95	37.26	32.25
bta-miR-147	16.58	92.32	32.81	32.42	63.44	51.24	56.9	57.74	14.05	45.3	46.08	46.99	38.95	43.1	50.78	41.2	32.92	24.85	34.33	21.59	35.51	34.59	35.93	36.99	57.38	19.47	44.56	75.23	49.18	45.65	33.01	32.19	55.2	26.76	64.31	26.46	25.58	29.63	44.08	35	32.71	32.74	80.75	44.35	43.01
bta-miR-148a	15805.3	9826.7	7360.18	10764.2	11805.5	8731.66	5751.33	13127.5	7427.21	7291.9	9485.68	10119.7	14131	14019.1	14328.7	12977.8	12596.8	6540.21	8415.1	6150.49	5837.81	7329.05	9343.97	11645.8	11188	9390.23	13000.8	12608.9	11875.8	12079	5822.1	4366.96	10075.8	7278.97	8843.83	9090.14	10031.9	10419.9	17356	8430.13	5508.9	9423.72	12334.4	7001.7	10735.7
bta-miR-148b	174.65	235.65	143.44	298.92	209.98	202.51	161.78	206.29	135.71	158.55	171.17	252.7	328.9	292.04	274.6	297.89	219.49	157.79	156.89	147.18	143.98	176.45	216.34	242.09	217.58	218.79	296.12	269.94	216.18	235.97	142.8	111.32	182.64	155.17	234.98	201.44	201.98	174	290.43	209.69	127.78	211.55	285.12	128.63	224.13
bta-miR-149-5p	48.51	57.84	47.23	39.37	69.99	55.01	51.36	61.95	37.01	65.17	62.64	41.44	54.12	45.2	69.59	69.46	39.95	30.13	62.76	34.5	50.27	50.84	74.09	67.06	64.01	34.52	68.82	62.9	66.1	74.52	63.09	36.49	153.28	63.53	55.41	24.09	82.01	66.15	97.82	146.67	61.23	47.28	44.55	101.13	58.99
bta-miR-150	3811.95	4545.2	4666.74	3290.06	5166.75	8025.03	9267.94	12382.1	4867.64	3764.66	3997.72	9498.54	5933.97	5958.77	5659.07	7349.26	2370.03	2548.58	6571.72	3478.82	7996.61	6971.51	13653.7	11721.6	5893.03	3349.4	6731.9	4730.39	5776.95	6056.61	4574.83	13637.4	4745.13	8063.75	7562.34	2845.33	4006.43	3671.88	3790.73	9944.4	7065.82	4258.22	2462.54	5848.5	4408.36
bta-miR-151-3p	3095.57	3653.88	3239.84	6386.57	5283.8	3708.37	4852.34	4593.66	2895.53	2914.69	3826.95	4859.28	6931.16	6478.91	7040.54	6457.24	3526.28	3643.38	4340.72	3288.2	3246.22	3619.25	5694.03	5647.44	5684.4	5195.08	6896.18	4266.35	4411.19	4302.46	2808.21	2860.53	3436.69	3344.55	4717.62	4951.69	4644.29	3983.35	7172.98	7690.57	2665.08	4202.85	4411.64	2356.96	4397.61
bta-miR-151-5p	914.08	553.37	410.67	1670.6	771.11	616.96	703.69	592.7	301.61	418.23	394.01	652.8	2100.53	1216.58	1080.53	1982.57	505.7	345.02	400.72	374.79	785.56	451.56	1083.91	730.48	519.09	615.54	907.87	616.31	690.07	1046.25	439.63	289.07	549.98	879.66	1091.54	1133.83	803.45	350.06	934.7	656.81	630.9	504.96	571.36	393.86	623.86
bta-miR-152	565.59	1027.81	510.85	569.28	1080.82	908.02	692.62	1324.63	428.02	575.39	677.29	689.54	755.77	896.94	960.47	622.02	999.55	391.49	671.13	395.88	502.74	642.87	753.1	683.86	566.85	282.45	540.82	799.88	743.39	696.83	451.53	285.17	700.02	516.88	582.99	268.04	553.21	598.83	856.81	548.26	428.21	479.94	1068.1	530.47	827.58
bta-miR-154c	87.32	98.31	57.92	54.23	110.73	75.54	75.66	77.58	33.79	54.44	70.22	55.54	48.52	43.43	67.71	48.86	56.19	44.6	64.05	40.95	68.67	52.93	60.75	45.11	34.83	45.53	51.42	75.53	68.97	67.8	45.8	38.95	94.84	70.02	64.06	32.84	64.6	51.68	84.84	92.09	38.03	40.1	55.69	62.1	62.58
bta-miR-155	111.99	63.83	106.4	303.94	211.39	169.17	175.31	275.45	121.1	92.19	106.93	293.72	298.34	272.34	217.23	498.6	118.96	93.96	151.35	122.86	153.82	98.21	194.48	252.31	283.92	152.17	214.38	146.25	103.46	149.03	105.75	131	209.07	218.97	400.7	214.58	186.16	73.73	144.61	738.52	195.85	176.97	126.41	174.75	171.75
bta-miR-15a	793.6	1333.27	2210.94	1286.96	2241.01	2285.68	1868.72	1379.06	1079.82	1945.71	1556.08	1891.97	1606.48	1678.61	1324.1	1180.43	1593.04	1643.56	1594.76	1294.38	1920.69	1819.49	2031.86	1359.61	1681.3	1028.41	1337.41	1950.05	1431.86	1464.14	1688.48	1797.34	1674.89	1741.75	2320.1	1060.29	1328.97	1298.61	1380.31	2772.28	1137.07	1111.83	1791.5	1410.45	2232.16
bta-miR-15b	86.11	123.1	147.91	150.33	186.34	186.69	162.7	121.49	108.19	192.52	119.9	179.65	170.05	169.51	125.07	147.85	115.01	168.34	119.05	117.4	155.53	149.05	212.26	142.85	169.82	120.07	156.1	180.26	128.05	136.95	156.5	154.78	135.95	180.58	211.97	118.78	117.87	135.06	133.74	367.63	115.23	93.08	128.64	118.87	187.18
bta-miR-16a	434.6	353.9	1231.25	1000.97	1101.42	1138.98	1054	658.56	921.14	884.14	723.58	1245.15	1213.67	1076.94	734.46	945.98	833.17	1337.86	801.07	1038.48	1165.72	700.68	1296.54	867.31	1048.45	1016.72	1022.57	1185.08	692.3	788.46	937.87	1008.25	882.96	1047	1367.82	1098.61	946.1	839.67	713.71	1874.78	659.43	773.54	730.63	717.65	1191.2
bta-miR-16b	1977.33	3110.77	9071.71	5265.18	6128.65	6639.08	6239.73	3974.8	6295.38	6199.33	4829.22	7554.87	6849.06	6599.02	4116.8	4551.43	4797.99	9219.51	5593.64	7290.98	6940.21	5076.1	7775.16	5430.01	5271.12	6364.91	6066.88	6730.4	4356.58	4126.91	6612.9	6620.66	4640.59	5915.68	7194.29	7373.35	5573.25	5392.91	4268.65	9948.85	3862.62	5198.79	4265.18	4367.08	6420.25
bta-miR-17-5p	153.63	127.94	224.72	373.22	240.89	246.03	206.37	163.59	198.92	182.39	192.71	287.1	415.91	276.86	271.15	311.74	205.88	210.72	181.44	203.28	224.63	198.5	284.5	239.68	379.45	340.61	347.8	303.04	227.36	209.11	212.41	173.03	195.56	251.95	398.97	339.02	255.51	220.86	268.09	367.48	196.99	248.89	215.51	180.08	372.44
bta-miR-181a	10339.9	7858.85	7837.72	13194.8	14854.1	10201.8	11085	8668.59	5589.29	7689.26	9069.53	8745.55	15674.8	12049.8	11679.3	15994.7	8674.14	5638.43	9800.73	5954.4	11512.2	9475.43	12093.4	10189.7	9404.23	8455.3	9861.06	7375.9	7420.21	10178.8	7707.26	6738.54	12064.8	10130.2	13014.1	9185.57	8325.34	7140.82	10769.9	33999.8	11933.9	8513.68	7663.85	9171.49	10557.1
bta-miR-181b	711.13	669.63	685.6	1204.95	1256.86	863.56	1007.25	802.6	486.48	648.7	883.77	897.18	1254.25	952.96	1221.28	1445.86	791.91	456	880.44	489.71	975.75	762.2	974.63	788.82	948.95	682.96	914.99	798.38	671.86	861.97	594.33	489.98	1020.08	994.01	1177.12	843.16	804.5	566.79	971.23	2834.71	934	688.55	769.06	840.95	1050.61
bta-miR-181c	160.9	127.94	72.59	281.94	252.36	152.78	190.07	132.01	64.72	94.97	95.96	162.13	301.14	214.55	288.08	285.49	120.28	78.98	119.98	84.14	177.35	159.96	203.37	157.58	223.55	147.2	213.32	124.29	112.72	156.75	128.88	91.23	182.64	188.69	289.15	161.48	154.26	75.46	214.05	843.07	180.26	137.23	199.36	102.01	202.35
bta-miR-182	24.26	47.59	32.56	45.16	111.43	36.55	25.83	58.34	29.8	37.95	48.48	60.24	27.99	39.39	51.41	32.45	70.24	29.96	41.16	33.51	30.59	28.56	52.23	31.88	39.14	27	37.18	64.7	50.77	40.95	32.78	29.32	35.53	30.55	34.88	20.98	46.94	42.72	37.13	594.97	28.14	40.84	58.47	24.84	40.52
bta-miR-1839	43.26	79.5	98.19	105.75	175.34	124.52	93.19	107.65	63.97	119.41	105.73	98.9	157.92	134.96	114.73	123.06	94.38	82.04	121.82	64.78	124.3	108.19	103.72	123.3	153.24	83.67	97.3	108.04	98.67	109.09	107.33	96.15	116.57	106.51	148.41	79.92	103.36	95.79	106.57	193.97	85.57	73.21	116.39	79.84	164.58
bta-miR-186	8946.31	10187.2	6997.99	14389.1	10551	9345.99	5020.57	10189	6850.76	7441.5	8343.36	11468.5	15247.7	12376.2	6554.97	14280.5	9250.08	9030.23	9011.29	6929.85	9108.64	9134.15	5331.74	11752.3	13901.2	10369.5	14274.1	10228.5	9796.64	9968.04	8334.16	7169.48	9432.11	10144.5	15254.3	10934.7	9508.49	7112.91	13744.6	15512.8	7803.58	8971.37	10803.6	7015.89	12056.5
bta-miR-18a	22.64	27.64	36.29	69.66	45.88	47.66	39.98	35.48	30.94	36.76	33.52	60.24	85.84	56.66	61.13	67.09	42.58	45.11	39.5	37.48	34.02	39.93	60.01	44.51	69.65	52.25	56.43	58.38	37.68	41.96	48.27	34.24	45.22	58.39	86.57	54.19	48.52	46.17	50.72	62.43	36.51	37.16	44.55	27.5	68.92
bta-miR-191	24041.7	14067.3	18763.4	56952.9	24954.2	26477.2	27301.9	25848.2	25472.3	15354.7	23714.4	33577.9	50352.3	44862	36297.6	46326.3	26272.6	26255	28489.3	24501.9	23381.4	25932.6	30524.6	37936.4	45911.3	54456.2	51022.2	26354	26098	26440.5	24137.3	21713.9	28289.9	27612.3	44584.5	46167.3	35592.5	31771	38894.5	41387.8	26536.7	39327.1	27137.5	18217.9	38245.6
bta-miR-192	47943.2	32350.4	21080.5	37652.1	32210.1	39351.6	17513.9	60528.3	32641.4	30953.3	48316.2	38156.5	41234.5	50854.9	51208.1	33372.8	63510	26331.6	37926.2	28996.6	26439.8	32317.9	27345.5	29419.4	32666.2	18101.8	36624.7	47498.9	40399	53176.3	39836.6	29469	33942.6	23764.7	30815.8	17402.1	38196.4	40440.6	41825.4	42373.7	30554.9	30942.9	62133.8	28665.9	33441.9
bta-miR-193b	275.72	127.94	106.64	71.98	98.32	124.52	81.81	162.08	148.81	104.71	99.15	85.45	105.43	131.73	91.22	154.96	115.45	91.91	112.41	63.54	121.51	75.22	107.43	78.79	70.65	68.23	94.66	73.73	98.03	105.06	59.95	69.7	108.06	100.29	96.71	53.46	104.16	138.85	116.84	105.59	57.42	90.87	66.83	100.24	102
bta-miR-194	149.58	168.69	109.88	153.22	141.86	171.43	111.64	299.51	97.75	136.69	158	171.75	182.41	199.86	230.09	190.14	205.44	102.13	115.18	104.74	121.94	127.69	141.88	143.15	147.93	50.77	173.77	274.15	235.98	254.43	117.65	107.84	144.76	105.97	132.33	62.22	152.94	170.9	234.28	245.88	131.96	86.28	242.8	154.35	141.7
bta-miR-195	52.56	21.09	27.59	38.4	38.39	31.65	31.99	40.6	28.66	37.95	28.13	39.09	45.49	33.09	51.1	52.32	44.78	33.87	36.55	22.34	39.79	22.52	44.82	34.88	33.5	28.07	41.4	46.64	47.58	44.31	27.39	26.04	78.69	42.98	35.87	31.02	49.05	36.18	74.27	45.38	31.56	21.89	20.6	50.56	36.11
bta-miR-197	56.6	36.76	73.08	120.8	53.84	64.62	95.65	55.03	87.31	58.81	53.66	70.07	141.82	81.85	54.54	162.98	41.7	62.47	69.4	103.5	115.74	60.36	85.57	52.93	99.51	100.06	84.12	52.06	54.92	78.88	71.63	80.16	64.6	95.97	102.4	109.84	98.88	62.02	52.53	48.05	130.44	113.32	20.05	47.02	80.22
bta-miR-199a-3p	895.08	2279.3	2554.24	1560.6	3296.08	2513.81	942.66	2296.23	1341.95	2859.86	1867.29	2076.11	1490.78	1475.2	1890.22	1837.45	2019.28	1928.67	1396.52	1526.95	2323.32	1866.39	1849.61	1549.97	1424.58	1535.15	1662.28	2068.02	1786.32	2302.28	1805.01	1606.27	1606.18	1065.92	1781.13	1415.73	1781.19	1713.11	4389.11	2583.49	1384.26	1266.17	1332.62	2268.26	2473.38
bta-miR-199a-5p	311.7	451.64	126.53	129.1	206.24	152.59	193.15	176.22	90.73	148.22	117.1	187.13	128.53	82.66	186.83	117.22	175.15	97.19	108.72	93.82	109.53	114.23	127.06	112.47	91.21	83	158.48	165.81	245.24	236.97	72.3	72.98	206.13	124.35	95.97	87.95	136.85	126.11	320.93	116.56	73.4	83.33	181.54	145.48	134.25
bta-miR-199b	71.96	182.94	152.63	58.09	119.62	116.42	124.56	74.58	71.75	140.27	95.56	83.1	68.58	74.58	82.13	83.31	84.28	122.21	87.49	66.77	119.37	95.88	106.69	66.16	68.66	60.17	91.76	113.15	110.81	106.07	97.67	88.98	102.48	118.14	92.01	66.6	68.82	68.22	141.59	132.13	61.99	54.45	96.34	99.35	111.1
bta-miR-199c	2449.13	3393.44	2585.81	1589.94	3567.63	2724.24	2871.67	2549.13	1355.61	2993.77	2009.53	2111.36	1634	1590.63	2051.66	1951.21	2054.4	1943.99	2031.28	1548.79	2442.05	2006.39	1987.41	1666.05	1553.61	1550.47	1794.91	2270.25	2569.63	2454.33	1918.17	1691.55	3708.3	2525.18	1811.06	1431.61	1908.55	1821.3	4578.4	2753.89	1405.18	1286.77	1942.41	2293.09	2510.04
bta-miR-19a	91.77	131.65	170.28	227.91	218.88	196.11	150.4	159.38	114.26	164.51	154.61	87.37	304.17	269.11	190.9	250.67	141.79	148.08	169.44	123.85	168.58	188.06	203	182.24	287.24	182.93	232.83	234.43	161.58	166.49	204.1	171.6	193.21	191.4	324.52	133.93	159	144.37	208.92	368.37	151.74	153.6	127.53	122.42	269.34
bta-miR-19b	418.83	424	551.12	717.68	807.87	699.85	536.38	520.53	358.17	581.94	604.68	327.68	924.89	785.39	628.82	705.52	528.53	453.61	614.83	433.61	595.8	666.55	618.63	619.51	977.47	585.45	742.01	644	521.78	550.14	675.17	559.89	658.33	563.37	1051.22	441.01	483.86	481.34	665.7	1566.17	465.86	477.18	447.74	397.41	876.65
bta-miR-200a	230.84	327.97	236.9	411.43	280.21	319.5	227.9	327.17	247.7	255.31	446.87	481.06	292.98	251.19	435.72	228.61	601.83	204.76	283.88	391.67	274.05	256.08	272.64	172.32	290.55	181.72	348.33	504.97	487.61	583.37	282.24	317.56	227.57	253.57	239.68	143.42	322.49	321.47	420.25	456.16	259.74	282.37	453.3	230.64	347.63
bta-miR-204	187.18	31.63	79.05	121.38	115.18	78.93	99.34	67.66	94.33	43.71	125.68	45.93	291.34	169.67	114.1	267.62	46.97	60.08	103.36	82.16	159.17	125.83	94.09	76.99	166.51	216.1	177.46	48.45	87.81	89.29	101.71	123.62	132.72	128.41	102.65	263.66	208.05	31.7	84.84	47.9	227.03	195.55	91.89	141.93	96.49
bta-miR-205	431.37	773.92	436.02	496.34	986.72	620.92	1015.86	792.97	313.18	456.58	452.86	722.65	416.61	418.77	874.89	538.35	470.58	294.3	522.36	470.35	623.19	526.09	622.34	480.27	535.01	293.2	462.51	675.6	532.64	586.39	343.76	566.04	638.95	491.46	465.01	243.59	505.22	382.11	452.26	1569.73	445.32	471.11	571.92	669.74	515.79
bta-miR-20a	61.05	49.58	108.63	150.52	143.74	134.32	103.65	98.63	80.29	81.86	86.38	137.78	200.14	151.43	112.54	156.42	118.96	97.02	90.07	88.86	133.71	99.14	142.62	116.98	177.78	125.04	136.06	149.56	90.37	110.1	105.75	103.74	101.89	144.09	217.42	115.68	113.65	114.39	112.91	212.66	95.45	86.09	113.05	91.37	175.06
bta-miR-21-3p	242.16	395.22	196.63	628.72	397.73	357.74	408.44	484.14	214.1	212	333.56	417.61	685.79	569.22	715.03	502.8	448.63	286.47	322.64	251.18	233.62	339.66	454.53	525.38	581.77	394.47	619.4	574.48	435.88	425.61	270.78	198.04	382.61	278.71	596.35	443.93	418.73	408.64	655.74	420.28	278.75	422.92	605.89	238.62	495.67
bta-miR-214	67.92	59.84	48.97	49.6	62.27	66.88	67.97	64.95	34.55	55.63	46.88	53.4	41.29	35.03	52.35	51.05	55.31	51.06	41.53	32.51	38.94	38.31	56.31	48.12	32.84	39.08	47.2	53.27	74.08	63.1	38.39	37.52	111.29	45.69	36.36	39.05	53.26	58.57	92.38	41.67	34.23	41.39	38.98	60.32	57.62
bta-miR-215	3814.78	11819.3	7733.32	16853.8	5263.66	12965.4	657.25	7751.72	10006.7	14286.2	16156.9	18942.2	6905.51	16104.2	2068.28	5197.15	21341.6	11023.8	12540.6	16022.3	4154.37	11148.9	1053.53	4570.82	6461.53	6332.54	14524.9	22041	19961.5	19263.1	16949.7	10616.5	13768.8	7550.66	5525.45	5989.73	14492.4	17109.7	16344.6	12910	10922.7	11136.7	16034.4	9236.24	10091.2
bta-miR-21-5p	7304.12	8180.84	7203.08	16844.2	13981.2	12135.4	10576.6	11946.6	6184.15	8903.42	9292.37	12798.4	18795.6	14983.4	14184.2	15363.2	11694.3	6195.7	9584.41	6727.06	9357.44	9351.46	10664.6	13297.8	15889.3	9425.82	13123.4	13050.6	9751.93	13185	9080.72	7996.7	12176.7	11700.5	19908.8	10961.1	10642.1	9516.5	13296.8	16881.9	9441.12	9808.74	13464.9	8592.23	14846
bta-miR-221	1512.01	2318.9	1558.64	3103.26	3010.25	2732.34	3156.77	2500.71	1278.36	1532.65	1773.33	2329.24	4239.31	3757.91	3644.4	3583.93	2109.27	1278.12	2026.3	1312.5	2018.89	2044.46	2914.62	2128.58	3477.04	2398.22	3902.55	2307.26	2037.31	2200.57	1753.37	1446.57	2271.26	2031.82	4073.04	1938.49	2478.11	2076.95	3069.48	3070.65	1882.44	2034.19	2366.2	1355.45	3091.45
bta-miR-222	695.36	389.81	398.73	1148.98	591.56	580.04	941.43	565.64	558.23	410.68	443.88	813.44	958.01	910.18	1216.89	990.65	452.14	362.04	499.65	606.86	515.37	576.94	957.59	536.51	632.19	786.92	1089.81	739.7	574.15	971.73	386.87	372.71	747.59	680.97	515.22	1004.46	920	543.7	594.45	417.01	605.42	689.1	489.5	657.32	537.57
bta-miR-223	1012.32	952.29	760.43	2070.83	1281.45	1293.64	1071.22	1075.04	812	678.7	940.43	1601.46	2038.25	1587.4	1392.12	2184.01	965.31	774.97	973.1	1118.9	1227.12	903.59	1093.54	1211.65	1994.41	1331.68	1817.59	1471.27	1400.89	1403.05	923.95	667.93	1245.6	1149.45	2156.36	1357.71	1308.41	1075.34	1525.53	805.11	1021.46	1032.18	891.02	830.3	1363.5
bta-miR-22-3p	80244.3	73070.8	47974.9	92134.3	83012.5	76799.3	70168.1	99747.6	53646.9	53227	69353.4	77849.9	97856	95063.7	103955	100722	76159.5	52955.9	67369.2	48050.2	60723.9	63568.3	69921.2	87137	102760	72243.7	97158.5	78190.9	78209.6	84925.5	61350.1	51902.7	82188.8	66076.8	102376	63445.6	78141.3	76439	101573	73247.8	61969.6	70819.9	81862.6	56271.7	92241.1
bta-miR-224	86.11	73.52	88	48.24	87.55	63.67	69.2	63.75	42.14	59.61	84.19	54.9	64.61	49.56	68.34	50.32	57.07	48.85	70.69	41.2	70.38	49.92	52.97	55.64	57.05	43.25	68.03	73.13	87.5	85.59	37.95	39.16	76.05	80.02	57.88	38.68	64.87	55.47	115.63	63.62	45.25	53.72	51.23	68.3	84.36
bta-miR-22-5p	62.66	144.75	63.14	106.33	110.73	109.26	87.65	146.75	61.5	70.53	94.96	129.02	82.34	100.09	117.86	90.79	128.62	52.25	87.12	62.05	67.82	90.08	83.72	96.23	102.16	48.08	79.63	132.71	115.92	101.7	70.5	55.35	106	67.58	92.51	51.64	80.16	68.57	101.14	85.57	68.83	85.36	125.86	79.84	97.87
bta-miR-2284aa	218.31	209.15	320.18	633.54	632.76	614.89	446.57	451.07	253.2	286.7	414.75	452.65	902.96	685.46	628.51	797.77	359.96	260.42	450.74	244.48	469.58	519.36	449.34	473.35	930.37	469.95	478.06	420.71	355.73	335.99	388.44	301.57	530.6	483.9	1132.59	419.85	395.26	374.87	496.33	480.93	483.35	477.73	493.4	326.44	702.98
bta-miR-2284ab	28.7	37.04	43.75	103.82	51.27	82.89	62.13	79.99	52.01	60.8	50.87	70.49	55.05	98.48	62.69	123.42	49.6	60.6	52.42	49.89	39.58	63.85	58.9	87.21	98.18	80.45	84.64	44.54	40.24	65.12	65.56	70.93	72.53	60.55	118.48	60.58	58.01	45.48	64	146.07	62.75	44.52	57.92	54.11	65.06
bta-miR-2284w	21.43	65.54	43.01	44.19	98.09	46.53	71.66	38.49	26.19	75.9	57.46	51.69	70.45	44.39	70.84	37.37	34.68	51.74	71.62	31.52	65.46	48.52	73.72	45.11	43.78	38.95	54.06	73.13	53.97	63.78	66.01	87.13	86.03	44.06	52.93	30.84	39.55	50.65	61.89	138.21	71.11	55.92	62.93	62.1	44.94
bta-miR-2284x	935.91	1323.01	1233.74	1323.44	2037.11	1655.53	1829.35	1344.78	898.36	1400.52	1467.3	1265.66	1337.99	1334.91	1520.96	1450.78	1064.51	892.42	1557.84	942.68	1541.82	1802.54	1318.4	1466.07	1923.43	1200.46	1473.74	1164.92	1094.65	1220.12	1320.24	1643.79	1636.72	1425.19	1715.09	945.53	1152.04	1187.32	1501.08	2640.74	1356.88	1192.77	1329.28	1301.34	1777.57
bta-miR-2284y	982	1354.07	1261.09	1393.68	2068.24	1670.98	1897.94	1366.43	943.54	1425.36	1503.61	1330.6	1367.62	1363.81	1561.39	1471.57	1116.31	912.33	1589.03	985.62	1584.39	1837.83	1350.25	1477.19	1890.93	1239.94	1494.31	1198.62	1124.67	1247.98	1345.62	1668.8	1498.41	1468.99	1747.74	975.63	1177.88	1218.33	1542.14	2753.74	1404.42	1248.51	1353.79	1354.57	1815.89
bta-miR-2284z	205.37	187.5	289.85	596.3	582.67	569.49	415.82	415.28	233.65	261.47	384.63	420.6	838.81	636.22	593.09	750.55	335.82	240.17	416.96	227.6	430.43	479.19	416.37	436.96	866.03	438.52	447.21	394.22	331.14	314.51	358.58	277.59	491.25	450.64	1057.9	396.68	371.8	346.96	461.61	444.45	449.12	445.36	461.66	306.93	653.36
bta-miR-2285k	72.77	126.23	48.47	154.19	95.04	90.42	87.96	127.8	65.48	47.29	68.23	130.3	174.48	167.25	163	146.21	97.89	68.94	77.89	62.05	60.97	85.9	115.95	144.65	103.82	99.39	148.72	106.53	109.53	107.07	79.48	61.5	83.1	70.56	142.97	89.22	96.25	105.78	156.09	130.5	70.73	96.39	151.47	56.77	83.53
bta-miR-2285t	27.49	92.89	30.08	20.26	78.66	35.6	41.83	64.35	12.53	48.48	37.51	22	53.18	40.2	38.87	52.32	26.78	34.72	35.62	15.64	38.94	22.52	38.16	40	54.06	25.12	47.99	27.99	47.26	56.39	31.21	19.89	27.6	40.28	49.72	30.29	33.49	18.26	40.76	42.56	33.47	30.72	43.44	35.48	44.94
bta-miR-2285y	43.26	68.1	101.42	124.08	167.85	152.4	101.49	119.08	65.48	83.65	100.95	106.59	212.04	162.4	120.69	156.6	81.65	68.43	114.81	56.09	130.71	134.42	109.28	123.9	212.61	103.15	103.89	88.17	83.34	72.5	100.14	80.36	130.96	111.92	249.82	77.36	76.47	91.65	116.84	117.01	114.09	107.25	105.25	65.64	162.93
bta-miR-23a	2368.27	2223.16	1830.85	3007.74	2776.62	2594.63	3254.58	2592.73	1637.48	1595.43	1679.17	2950.64	2771.86	2126.27	2880.79	2490.29	2689.16	1209.18	1718.24	2213.98	2215.28	1789.78	2240.05	1825.74	2039.19	2007.65	2382.93	2983.46	2705.02	2364.37	1692.52	1431.6	2105.36	2045.61	2354.48	2050.34	2531.38	2046.29	2374.79	1269.43	2012.88	2284.92	2245.36	2120.11	2371.1
bta-miR-23b-3p	1354.74	1436.71	1111.68	1733.9	1712.89	1474.12	1802.9	1528.21	944.87	960.64	1034.99	1872.75	1589.45	1188.98	1775.81	1249.15	1738.34	651.91	973.1	1295.87	1282.53	1041.73	1389.89	1061.88	1096.55	989.86	1326.6	1880.54	1683.17	1251.33	859.73	757.52	1128.14	1158.1	1316.37	1095.15	1397.27	1128.75	1396.01	754.84	1142.4	1386.48	1495.79	1264.97	1356.33
bta-miR-2419-5p	359.4	159.57	303.03	443.85	290.98	537.84	524.39	660.06	539.44	176.43	224.23	532.75	396.78	595.86	358.3	837.14	454.34	176.51	256.01	568.39	287.95	725.29	543.06	974.97	611.96	680.14	874.12	736.39	775.01	432.33	169.75	772.28	416.96	565.81	729.17	612.16	788.95	827.27	801.26	735.7	181.78	255.15	503.98	384.99	642.33
bta-miR-24-3p	365.47	450.5	269.47	570.25	428.87	378.65	394.9	455.28	280.35	264.65	424.93	538.95	410.31	369.2	389.96	358.23	504.38	359.83	310.09	393.65	321.76	325.73	209.3	413.51	558.56	435.43	426.64	314.78	374.57	376.61	276.62	237.61	429.59	278.44	443.74	395.4	392.63	340.07	473.09	338.86	303.85	436.53	330.23	272.33	431.99
bta-miR-25	5077.76	11402.8	17831.5	7977.47	14820.4	13074.3	14565.3	8687.84	10480.1	14648.8	11049.5	11814.3	10467.9	11465.7	9687.79	8764.68	9268.95	15995.1	11719.8	11900.4	13395.4	13123.9	14757.6	10468.5	10012.2	11223.8	10816.4	10116.8	9899.14	7876.55	10694.2	13118.1	8302.8	9414.06	9930.67	10288	9105.32	9864.49	10666	18408.2	7787.61	10212.1	10063.5	8221.43	11821.3
bta-miR-26a	8550.92	2930.4	3142.15	17075	5966.89	4830.39	6392.59	5881.6	2965	3178.54	2906.87	5855.36	17351.5	9782.06	9500.96	19936.3	4255.42	3364.23	3260.02	3409.33	6546.36	3640.84	8475.29	7224.17	5220.7	5599.89	6975.81	5223.62	4661.22	7769.48	4004.74	2563.68	5035.24	7940.2	11135	13233.7	6674.93	1954.64	6878.02	7069.35	6631.9	4489.82	5549.91	4077.89	5394.45
bta-miR-26b	1695.95	590.98	1054.26	4418.21	1982.8	1923.41	2062.79	1695.41	1296.2	931.83	985.71	2276.48	4909.71	3356.9	2725.62	4933.9	1551.78	1114.55	1356.46	1266.58	1982.09	1177.55	2375.63	2259.1	3190.13	2257.07	2619.72	2183.28	1441.76	2126.73	1411.63	1093.94	2040.17	2682.24	4766.59	3417.9	2073.09	1016.77	2114.85	2380.92	2157.77	1733.24	1938.52	1542.63	2512.25
bta-miR-26c	7430.66	2388.43	2467.23	15173.6	4702.07	3741.33	5200.49	4854.68	2417.4	2378.05	2273.67	4869.11	14904.5	8166.24	8230.47	17218	3538.14	2653.26	2388.63	2790.55	5145.95	2839.17	7288.4	6123.2	3670.08	4708.48	5584.34	4311.79	3916.55	6632.94	3156.46	1923.83	3853.36	6153.58	8642.99	11803.2	5559.28	1594.93	5747.38	5128.88	5262.85	3810.29	4511.32	3132.27	4042.26
bta-miR-27a-3p	5192.17	7613.8	4322.69	6353.76	7837.09	7056.54	6894.83	8531.47	3455.65	3955.2	4455.17	8069.03	5084.19	4928.48	8014.49	5234.52	7182.51	3407.29	4745.32	4572.66	3763.94	3967.97	6162.27	5637.51	5739.79	3855.61	5719.87	7731	6493.84	5808.23	3915.6	2868.32	5431.64	3637.05	5277.86	3901.25	5813.73	4990.13	6460.79	4547.1	3447.72	4755.09	6277.2	4407	5340.42
bta-miR-27b	21027.8	16252.8	13317.8	25005.6	23819.6	17917.2	17787.9	23520.4	13754.7	14165.4	16837	21444.9	26372.2	19773.2	25920.5	21687	26159.4	16165	19234.7	12137.9	15825.9	14324.2	19816.7	18986.4	25484.6	20271.7	20773.2	20304.3	21362	19250.7	16566.8	11110.6	21761.5	13603.7	27109.5	21388.2	20048.8	16273.8	29879.9	21850.9	15261.5	15044.7	23247.2	15605.5	20285.2
bta-miR-28	169.8	102.01	72.09	293.52	141.16	136.2	137.79	135.62	77.63	108.88	97.55	193.32	282.95	204.86	171.47	280.75	105.35	64.85	83.8	69	145.69	113.53	164.85	177.13	196.36	113.09	150.83	112.25	122.62	154.74	109.12	92.67	139.48	166.8	312.4	174.25	128.68	65.46	171.18	338.27	168.09	107.06	129.75	100.24	146.66
bta-miR-2957	556.69	1023.82	506.62	561.56	1073.1	903.68	690.47	1318.92	425.36	570.22	673.5	686.34	744.57	887.74	952.95	612	992.52	386.89	664.67	391.17	492.47	638.46	747.55	679.05	560.55	277.89	534.75	795.37	739.88	689.11	447.72	283.53	689.75	510.39	572.11	261.47	541.35	595.38	849.56	541.88	422.88	476.08	1064.76	526.04	819.04
bta-miR-296-3p	293.51	728.33	580.45	1028.95	938.49	760.14	843.32	826.65	594.86	620.89	926.86	792.08	1148.35	1000.9	1303.09	947.44	650.56	506.04	999.31	670.4	790.06	939.35	888.31	950.61	1237.51	849.37	1014.4	875.72	896.03	878.75	747.69	620.16	737.02	768.01	615.64	762.7	856.19	966.47	1024.06	816.82	764.01	994.1	1139.94	641.36	1179.62
bta-miR-29a	2595.88	2216.32	1239.71	2214.8	2270.74	2320.72	1809.67	3527.34	1413.12	1206.21	1539.92	3186.69	2608.34	2370.69	2785.81	2381.45	2535.08	1121.86	1534.77	1290.91	1496.25	1641.65	2476.39	2636.21	2180.82	1311.26	2218.39	2511.9	2237.53	2295.9	1415.45	1283.17	1829.34	1549	2523.42	1453.5	1672.56	1608.71	2517.9	3042.77	1326.08	1684.49	2390.71	1328.84	2059.59
bta-miR-29b	39.22	39.61	26.1	44.19	44.48	47.66	27.99	55.93	32.65	28.01	33.12	59.17	50.15	49.56	49.84	46.49	52.68	29.62	28.98	36.73	22.89	36.45	45.56	36.09	38.48	29.15	42.45	51.16	41.19	58.4	30.76	23.37	36.12	35.41	45.26	26.46	34.81	38.25	53.74	45.08	26.24	26.67	59.03	25.73	38.04
bta-miR-29c	266.42	296.63	227.21	361.25	379.24	388.83	299.56	316.95	196.83	249.35	293.26	376.39	488.45	424.09	461.74	404.35	346.35	210.21	240.69	207.99	253.51	321.55	397.48	334.41	517.09	251.43	416.89	491.73	303.68	356.13	315.69	234.33	307.14	274.66	579.04	265.67	310.89	304.93	401.84	400.85	257.84	244.85	480.03	235.96	448.25
bta-miR-301a	504.14	556.5	784.05	1209.19	998.66	1040.08	828.56	748.47	571.13	779.64	854.25	794.64	1394.21	1253.55	1031.94	1356.9	672.95	725.27	942.27	597.18	694.43	947.47	838.31	1073.91	1579.15	956.15	1338.47	877.52	731.9	727.37	916.31	588.59	946.97	863.17	1447.22	911.77	931.07	837.26	1091.69	1195.43	719.51	723.87	805.26	662.65	1408.99
bta-miR-301b	90.15	60.41	77.56	334.62	194.07	165.03	118.72	206.29	91.68	65.17	141.24	202.51	369.02	272.67	255.16	360.42	112.82	91.57	142.86	118.39	110.82	124.91	150.4	246.9	291.88	240.55	321.43	246.47	137.31	205.42	156.72	83.44	199.96	156.25	284.69	266.58	226.77	221.2	239.41	166.69	151.74	185.98	174.3	117.98	273.75
bta-miR-30a-5p	15288.6	3520.81	3254.76	3643.4	5737.94	4776.32	2977.16	9364.74	5065.42	3826.65	4472.12	3412.05	4136.68	5067.16	4794.84	5032.17	7243.52	3110.62	4469.19	2703.68	4091.47	3687.97	3356.18	4292.34	4046.87	2395.54	3201.94	4007.54	3922.93	5247.34	2943.16	2386.96	6084.1	3860.62	3175.91	2245.58	4154.89	3851.39	5477.78	4225.15	3102.8	2894.92	5159.54	6949.36	4946.48
bta-miR-30b-5p	732.96	305.18	295.82	810.89	515.01	595.86	788.27	751.48	294.77	310.74	372.86	647.04	910.42	790.71	895.27	1501.28	444.24	241.7	421.21	267.81	651.21	481.05	988.33	637.85	1063.71	600.63	773.13	898.59	531.04	690.78	505.87	325.15	782.83	1023.21	1400.72	744.09	582.48	508.56	718.23	1043.27	794.43	353.56	789.11	604.99	1006.5
bta-miR-30c	849.8	246.48	292.84	895.8	496.99	474.92	673.24	336.8	192.47	276.77	254.16	346.48	902.26	624.43	475.53	1430.37	247.58	119.15	214.66	224.13	732.94	319.93	628.27	380.43	363.53	352.96	393.42	455.61	266.64	592.44	374.07	223.87	397.29	788.02	792.25	802.29	421.9	244.98	342.66	432.44	665.89	268.94	342.48	337.98	459
bta-miR-30d	15589.8	5149.29	8952.14	27726	16701.6	17149.3	19930	14470.2	13215.2	8551.35	12831.5	18153.1	25776.5	20504.3	20692.5	27584.9	12022.6	9248.61	15790.5	12677	15824.4	16171.4	14398.2	17304.4	33053.6	26272.2	22723.7	13047.6	12232.1	15179.5	14479.8	13497.4	17175.8	21481.7	31004.5	23457.9	18829.2	12353.5	16899.5	16180.5	20448.3	18903	15076	13238.7	25338.6
bta-miR-30e-5p	9524.43	6324.7	8462.42	15241.7	12258.2	11703.1	10462.5	10032	7179.32	7554.16	10250.4	12106.3	15471.6	13809.4	14033.1	13748.4	9442.79	8757.89	11308	8040.56	9092.81	10736.8	11605.9	11598.3	18616.1	11438.4	14783.5	10851.7	9378.96	11185.5	10792.5	8090.39	11487.3	11007.9	17750.5	11905.4	11208.7	9223.97	12914.6	16371	9377.99	10316.3	10967.3	7930.47	14946.1
bta-miR-32	154.43	125.09	157.36	269.97	257.51	243.77	192.84	342.21	170.26	137.09	158.2	438.33	272.45	221.49	245.45	204.36	289.28	152.85	188.09	166.05	185.69	166.23	256.34	329	230.85	149.75	212	241.95	193.83	226.23	167.28	187.59	192.04	163.28	347.03	147.43	159	189.16	191.41	525.27	133.48	215.6	196.58	162.34	197.38
bta-miR-320a	1256.5	2534.04	2286.26	2678.13	3391.59	2854.98	3162.92	2752.41	1881.38	2490.7	3065.87	2291.43	2881.49	2868.07	3220.9	2665.3	2553.52	1710.29	3167.91	2225.39	2893.23	3000.76	2829.05	2688.24	2959.28	2307.03	2390.31	2383.7	2770.8	2656.06	2379.36	2470.4	3229.09	2449.48	2856.1	1779.38	2689.06	2550.37	2973.47	3372.73	2771.56	3026.45	2377.9	2847.52	3167.53
bta-miR-326	202.14	128.51	107.89	320.34	235.74	221.92	257.43	169.9	136.28	122.99	193.11	211.26	320.5	243.12	306.57	368.62	149.69	128.51	193.81	156.12	183.55	217.54	261.53	215.62	404.65	327.45	350.44	214.87	190.64	216.16	174.69	160.52	219.64	185.99	390.56	260.19	265.53	224.3	245.15	163.57	197.75	250	185.44	150.8	330.26
bta-miR-328	115.22	88.9	68.86	55	60.4	56.14	83.96	84.2	70.99	67.16	75.01	60.45	70.45	70.87	73.04	88.05	45.65	43.57	55	93.08	68.03	83.58	70.38	57.74	91.88	110.54	85.96	89.08	98.99	68.47	71.85	88.57	75.76	86.78	58.13	103.46	102.31	81.31	59.48	27.14	114.47	101.73	51.79	64.76	82.98
bta-miR-330	77.22	34.48	48.97	183.14	92.23	134.32	91.96	100.14	91.3	37.35	65.44	107.23	216.93	179.19	125.07	271.63	79.02	60.6	91.55	72.48	93.7	117.94	98.17	160.89	217.92	140.76	203.04	78.54	75.68	94.99	74.54	54.94	91.03	99.75	197.38	137.94	174.82	84.07	101.44	61.25	95.07	131.53	76.85	59.43	145.83
bta-miR-331-5p	25.07	45.88	57.92	34.93	50.8	37.3	50.44	35.48	37.01	43.31	41.69	41.44	41.05	40.68	48.59	35.18	34.24	46.13	42.08	35	48.13	34.13	62.97	40.3	46.1	36.53	42.19	53.87	46.62	48	30.31	43.87	31.42	35.68	43.78	34.85	31.11	43.41	51.63	64.21	28.14	33.85	38.43	33.71	48.79
bta-miR-335	42.45	52.43	31.57	36.47	61.8	48.6	37.21	55.63	33.79	41.33	36.11	51.69	36.86	35.84	30.09	31.36	43.02	25.36	31.56	30.78	61.18	36.91	48.9	47.52	36.49	27.26	40.61	47.85	57.8	51.69	44.01	46.95	62.54	28.11	35.12	25.54	38.23	35.83	53.74	68.51	27.76	23.18	41.21	43.47	34.74
bta-miR-339a	844.54	814.95	736.57	696.65	832.68	828.71	923.6	669.08	498.25	788.77	673.3	638.92	1072.31	848.51	813.14	1180.06	512.28	739.06	656.18	468.36	866.64	892.45	943.88	721.46	851.76	774.16	877.81	694.56	699.97	788.8	647.77	704.22	681.23	956.44	960.44	723.28	698.24	517.86	834.47	899.13	657.52	495.03	730.08	559.75	824
bta-miR-339b	1121.07	1238.1	1107.71	928.8	1223.15	1218.67	1312.96	965.58	741.01	1204.02	998.68	939.47	1396.54	1178.48	1125.67	1503.29	759.87	1125.1	960.18	683.06	1242.52	1326.83	1359.14	1042.34	1216.28	1055.8	1225.61	996.69	999.81	1065.71	935.4	1056.43	986.02	1271.1	1331.95	930.02	947.42	754.57	1179.85	1340.61	876.19	695.91	1035.25	798.37	1159.22
bta-miR-342	834.43	1226.7	894.92	905.25	1175.17	1286.3	1217.93	1573.92	784.48	949.11	958.98	1465.82	1080.94	1084.69	1047.62	1075.24	933.26	675.57	1093.07	773.15	1097.48	983.46	1482.5	1476.89	1014.95	603.99	1024.42	1184.78	1112.54	1302.69	898.13	1216.34	1107.88	906.97	1283.97	593.74	928.17	919.95	998.4	2168.11	873.91	878.21	819.73	982.88	914.7
bta-miR-3431	44.07	53.57	54.44	29.72	79.36	37.3	42.44	39.09	18.79	43.51	51.27	30.33	44.79	26.48	40.75	33.91	39.51	23.32	60.17	21.84	56.26	30.41	26.67	31.28	34.16	23.77	36.12	32.5	52.05	54.71	24.02	32.8	54.62	51.9	30.67	20.98	31.38	25.15	68.23	52.65	34.61	25.39	32.3	46.13	59.82
bta-miR-345-3p	69.54	68.67	66.62	189.5	123.6	107.57	100.57	140.73	55.61	53.84	92.37	128.81	198.74	189.53	207.52	274.19	103.16	53.79	118.13	63.29	74.45	109.35	158.55	148.86	238.81	188.17	266.06	176.95	108.89	120.84	79.04	58.43	102.18	87.05	182.79	150.17	143.44	149.54	182.65	115.38	73.78	127.48	150.92	57.66	153
bta-miR-3596	426.52	319.43	537.94	698	661.56	610.37	741.21	517.52	393.47	710.49	380.24	474.86	901.33	700.79	444.81	1077.24	381.03	667.23	503.16	333.34	1126.14	457.14	653.46	431.25	570.5	493.18	483.34	423.11	460.47	566.26	441.88	512.94	890.89	871.55	835.53	541.37	850.39	394.86	510.52	882.96	694.79	346.21	286.8	715.87	694.71
bta-miR-3604	733.36	1950.18	2221.88	1386.54	2931.59	2235.19	787.04	2054.16	1150.81	2375.66	1622.91	1826.4	1305.1	1256.3	1630.98	1532.27	1758.97	1579.9	1187.58	1332.36	1970.97	1602.88	1596.97	1325.93	1233.53	1316.1	1417.58	1773.11	1519.68	1988.44	1578.9	1350.82	1259.4	826.68	1528.1	1191.85	1513.55	1520.85	3669.36	2167.37	1193.35	1138.32	1165	1881.49	2146.15
bta-miR-361	424.09	385.25	433.54	661.72	526.25	560.26	549.91	656.15	540.95	338.16	387.42	796.14	606.48	617.98	634.15	537.25	617.64	439.49	398.14	536.86	401.55	351.27	574.92	495.91	561.87	578.87	571.41	622.93	542.86	545.44	313.89	357.34	437.81	364.41	535.5	554.14	595.67	581.26	516.26	498.43	332.37	656.17	414.88	384.1	503.94
bta-miR-365-3p	116.03	46.45	64.88	52.1	116.58	107.57	107.03	126	97.37	67.55	59.65	55.75	90.04	110.91	58.93	106.65	79.45	46.81	72.17	72.23	104.83	50.61	58.53	52.03	42.79	41.37	48.78	60.19	54.29	90.63	59.95	53.51	76.05	72.45	45.76	41.24	79.9	69.6	50.12	47.31	53.24	62.73	50.12	78.06	69.47
bta-miR-369-3p	53.77	54.71	57.18	63.3	103.94	78.18	71.35	81.49	30.56	46.29	58.65	69.42	46.42	53.92	54.86	55.79	64.97	31.32	62.39	45.42	61.61	43.42	60.75	60.45	57.38	25.52	58.54	72.53	70.25	64.11	41.99	30.55	86.03	44.88	57.63	27.92	59.59	44.79	57.36	67.62	34.23	37.53	76.29	62.98	67.54
bta-miR-374b	57.41	16.81	23.86	112.89	36.52	44.65	50.44	49.92	39.1	22.25	25.93	69.42	126.43	76.84	67.08	129.44	53.99	39.66	34.52	37.48	44.28	29.49	67.05	50.52	67.33	67.02	82.53	49.96	51.09	64.45	32.78	23.17	34.94	64.61	105.62	96.52	73.3	24.46	64.61	55.46	58.18	40.84	42.32	31.05	49.35
bta-miR-375	1186.16	1196.21	2072.48	2775.78	1752.45	2188.66	1756.77	2349.75	2685.22	1838.82	3338.78	2906	1862.6	1544.78	2706.5	1580.95	3226.46	1298.54	2408.19	4103.8	2270.05	2189.1	1737.73	1750.86	2331.41	2237.86	1964.72	2560.65	2713	3285.08	2992.33	3066.78	2191.98	1901.79	1386.62	1602.39	2542.19	2575.86	2228.67	1566.47	3183.42	2930.24	2245.92	2652.36	2476.13
bta-miR-378	716.38	1406.22	782.31	1127.18	2487.98	1333.96	1006.33	1212.47	731.71	1200.25	1343.81	1284.46	1205.97	1425	1306.54	1713.3	1537.29	809.19	1167.09	899.74	1279.96	1542.29	1149.1	1177.97	1191.74	852.73	1039.45	1214.57	1501.16	1468.5	1269.5	1313.92	2231.03	902.91	1363.37	790.8	922.11	1138.05	1513.15	3434.43	862.88	903.41	1539.79	1169.17	1079
bta-miR-380-3p	123.71	41.6	63.39	53.45	123.6	95.32	73.81	66.46	49.92	51.26	52.47	56.82	48.05	50.85	58.31	57.79	77.26	56.51	61.28	46.41	75.52	43.65	66.68	38.79	58.38	46.47	61.97	69.52	63.23	70.49	44.23	44.08	83.39	79.75	65.3	33.57	81.22	65.46	70.95	99.95	53.24	41.94	50.68	82.5	71.4
bta-miR-381	162.92	91.47	67.12	76.61	154.04	95.13	111.34	110.36	50.87	43.71	68.23	86.09	61.58	63.44	84.01	103.37	103.16	48.51	77.71	53.12	69.1	67.56	64.09	62.85	61.03	54.93	59.59	68.01	82.07	88.95	50.74	46.54	101.89	55.96	76.18	53.1	69.09	47.55	137.37	175.14	38.79	45.62	84.65	78.06	73.88
bta-miR-410	121.69	105.72	109.13	132.96	198.51	150.71	100.26	123.59	85.03	78.68	125.88	143.33	114.77	119.14	120.06	98.44	128.62	91.4	131.6	108.46	107.18	90.55	88.91	110.67	104.81	83.27	106.53	123.98	119.75	122.52	82.18	73.8	145.35	95.7	123.92	71.34	123.93	121.63	131.63	155.12	70.35	102.83	126.97	119.76	141.97
bta-miR-411a	158.88	77.22	65.13	59.44	108.62	81.76	71.35	63.45	41.57	60	68.03	55.75	50.85	69.58	57.05	82.04	75.94	53.62	65.53	52.87	96.06	71.04	70.38	58.64	65.34	58.29	63.28	51.46	60.67	69.82	47.38	42.23	94.55	81.37	82.86	51.64	70.4	48.24	142.5	125.16	49.44	40.65	61.81	70.08	70.57
bta-miR-421	739.83	476.15	480.52	2110.97	822.15	924.22	946.05	993.25	690.33	486.97	660.53	1282.75	1927.45	1595.8	1541.02	1575.66	834.93	712.51	864.19	746.1	671.96	757.79	1133.18	1168.04	1801.04	1595.73	1871.64	1250.68	887.09	881.77	769.92	606.22	1146.93	1035.91	2028.97	1683.95	1327.13	1102.91	1268.31	999.08	992.56	1222.02	971.76	670.63	1306.99
bta-miR-423-3p	9489.66	14379.3	10243.3	10113.1	13455.4	12471.3	13169.6	11637.2	8709.55	9469.47	13414.4	11009.2	11571.9	10594.7	13320	11525.5	10243.5	7942.41	12542.5	10252.5	9794.51	12969.5	11551	9760.24	11874.3	10466.3	11841.1	11723.5	12252	10964.3	9498.8	9441.01	10541.8	9659.79	9622.97	9085.4	11886.4	11312.3	12131.5	7009.44	10349.6	11830	11995.9	9725.02	11695.9
bta-miR-423-5p	11668.3	18051.7	21289.5	30380	25726.3	25028.9	25444.6	26841.5	27575.6	20108.4	27008.9	25900	32942.3	30269.8	29637.7	25543.3	23001.8	20247.5	26216	28844.5	23925.5	27445.2	24875.4	29820.8	31711.6	30446.4	28297.7	20736.2	26069.5	24875.3	24006.7	23662.1	22418.4	19794.5	25655.7	25054.2	27831.7	25252.5	25678	19613.4	25833.6	35413.2	24362	19606.2	32791.3
bta-miR-425-3p	44.47	50.15	55.19	125.43	86.62	113.97	132.56	107.96	53.15	58.81	102.14	77.54	195.47	149.17	172.1	190.14	51.8	84.25	93.58	50.14	103.76	91.71	157.44	129.31	172.81	89.58	157.95	117.06	98.35	107.75	83.08	81.8	116.87	120.84	186.25	83.02	158.21	105.78	102.04	102.18	125.5	79.47	116.95	96.69	142.25
bta-miR-425-5p	1193.84	1322.73	1526.08	2140.69	1658.57	1730.13	1871.49	1455.44	1504.23	1245.75	1594.18	1952.43	2502.21	1936.43	2034.11	2050.2	1466.61	1644.92	1524.62	1592.72	1629.74	1665.8	2094.47	1816.42	2322.78	2265.8	2145.88	1658.15	1664.97	1660.16	1486.85	1725.18	1400.34	1588.74	2126.68	1891.23	1680.2	1620.08	1784.26	2068.46	1583.53	1932.65	1425.07	1225.94	1898.04
bta-miR-429	55.39	84.34	70.1	127.17	90.13	126.41	78.12	150.36	100.03	106.89	139.85	171.75	114.3	94.76	159.56	111.94	166.81	74.72	108.35	136.51	104.4	83.81	117.06	81.8	102.16	70.38	104.42	200.42	151.36	215.16	106.43	102.92	83.1	83.53	80.63	70.25	132.9	131.96	127.71	149.34	91.65	89.59	105.81	101.13	98.42
bta-miR-450b	145.95	82.06	93.22	93.98	136.24	98.9	71.35	116.38	73.46	106.69	98.75	109.37	97.27	90.89	119.43	107.38	127.3	77.96	100.23	73.22	91.35	69.19	94.46	93.83	67.33	83.14	123.67	122.48	166.37	164.47	78.59	73.6	228.74	88.4	85.83	96.89	142.65	151.6	148.54	89.42	57.42	66.41	95.23	141.05	112.75
bta-miR-451	2990.86	12384.1	21011.6	5522.23	9755.51	14317.1	14296.5	4994.81	10926.3	14385.5	12356.9	11978.6	8652.18	12330	6190.41	5839.05	9934.44	20336.5	13394.6	12222.3	13413.2	14546.2	17898.9	7954.35	8784.64	9620.97	10848.6	12488.8	8959.68	7150.19	14703	13920.1	8718.87	10314.3	13015.1	9838.24	9822.54	8339.85	8502.88	14812.9	7069.24	8670.23	11885.6	8424.57	10583
bta-miR-455-5p	139.88	335.95	245.11	229.45	302.45	262.23	156.55	323.87	163.24	222.13	350.32	325.55	300.44	311.57	426.32	265.98	304.65	209.19	384.85	183.67	209.01	253.06	306.35	325.39	320.74	150.83	332.77	377.97	343.28	248.72	187.48	146.38	304.5	250.06	332.43	135.21	320.38	292.18	359.57	334.26	189.77	246.69	291.25	267.01	341.29
bta-miR-484	337.57	622.04	872.79	412.78	534.21	629.77	654.18	425.21	745	775.66	611.46	505.41	512.01	502.71	446.07	546	398.15	956.25	567.39	868.71	559.86	739.92	721.99	463.13	460.71	656.5	583.8	582.61	532.64	554.51	579.96	673.26	446.32	477.95	333.67	592.64	662.38	611.92	378.59	354.28	487.91	707.68	340.26	530.47	502.56
bta-miR-486	31910.6	128253	323270	67883.5	138208	153580	227870	56141.2	203513	262961	184664	101066	85540.4	119405	56936.8	74356.8	85841.1	359043	198925	257544	207886	218871	181107	104356	90858.5	206803	102651	101039	83862	74338.9	204885	273005	99780.1	139076	89405.7	154354	121373	156735	80489.3	137567	111557	135566	101570	136077	155808
bta-miR-497	192.03	251.89	141.45	98.61	262.19	183.86	177.46	178.62	51.82	162.52	183.54	121.12	170.98	129.96	237.61	159.7	135.2	60.08	136.4	65.77	167.3	167.62	220.78	128.71	183.09	64.2	162.96	279.27	214.59	224.89	142.58	95.54	344.14	158.41	192.68	56.2	163.75	145.4	325.76	199.46	112.95	71.01	238.35	200.48	211.44
bta-miR-505	46.09	55.85	43.25	33.38	40.03	49.36	45.21	51.12	30.94	41.13	37.31	35.03	55.52	48.75	46.39	65.81	28.09	30.47	29.9	30.53	52.63	43.88	71.87	31.88	49.42	25.38	48.78	57.78	46.94	55.05	46.25	46.33	34.65	53.26	53.43	28.1	36.39	35.49	40.15	36.63	47.92	26.86	45.66	34.6	50.72
bta-miR-532	231.25	351.63	229.2	278.47	419.27	338.91	382.6	376.19	159.63	243.39	238.8	295.21	256.59	262.01	335.1	287.13	255.92	175.66	255.27	174.74	223.35	223.34	269.68	263.44	282.26	198.11	280.3	292.81	273.98	283.63	192.65	171.8	287.17	202.21	277.03	192.32	243.12	237.74	290.43	363.33	206.5	212.84	263.96	223.54	275.95
bta-miR-6119-3p	19.81	29.63	38.53	40.14	46.35	57.65	56.59	47.51	41	48.28	27.93	51.27	59.95	43.75	39.5	47.58	29.85	49.19	34.15	35	39.58	42.95	55.57	42.1	37.81	42.17	45.35	44.54	49.5	40.28	39.52	40.8	37.88	42.98	51.2	32.48	40.87	48.58	36.83	44.49	31.56	30.9	31.19	38.14	42.45
bta-miR-6119-5p	173.03	110.27	103.91	403.32	208.81	190.65	204.22	169.9	80.48	143.45	100.35	131.16	436.43	302.69	230.4	481.1	148.81	118.3	116.84	105.24	234.04	161.59	248.19	176.53	153.57	137	185.11	164.61	128.69	240.33	179.18	137.97	204.66	294.66	304.73	254.17	167.7	80.62	165.44	203.61	235.4	129.51	187.67	162.34	202.62
bta-miR-6529	1131.58	1431.86	1759.5	4313.61	2316.15	2844.81	2687.44	2335.02	2493.7	1993.79	2561.54	2840.2	4106.35	4334.72	3467.92	3607.27	2172.49	2012.07	2797.47	2482.78	2069.38	2867.26	2659.39	3363.68	4730.47	4114.29	3944.48	2584.42	2599.96	2666.47	2201.53	2231.35	3278.13	2674.13	3886.29	3166.65	3721.39	3650.52	2888.03	1569.88	2843.44	3732.11	2388.48	2122.77	4109.25
bta-miR-660	1685.44	2501.27	1640.68	2316.69	3455.73	2471.24	2783.09	2792.4	1196.17	1671.33	1990.38	2185.05	2322.13	2174.06	2749.13	1973.63	2187.85	1390.8	2181.16	1401.85	1914.28	1998.03	2208.56	2099.41	2535.39	1539.05	2136.91	2291.92	2085.21	2108.27	1555.33	1499.87	2457.13	1673.9	2458.61	1438.72	1976.32	1955.67	2541.44	3266.7	1488.08	1749.61	2231.99	1747.54	2359.25
bta-miR-665	81.66	122.53	71.59	69.66	87.55	79.69	76.89	86.3	66.81	66.76	88.58	93.78	74.64	52.79	93.73	76.02	81.65	74.04	98.75	65.53	65.68	67.33	94.09	80.6	72.31	60.57	83.06	78.54	122.62	103.38	63.77	46.54	106	64.34	64.06	54.37	93.87	73.73	122.88	66.88	61.61	68.98	65.71	100.24	69.47
bta-miR-669	101.07	150.17	133.74	139.14	119.86	144.11	175	146.75	121.29	129.14	128.48	145.04	160.02	140.61	124.76	194.88	93.06	101.62	132.53	138.25	138.63	105.4	146.32	105.26	94.2	100.33	139.23	137.23	132.52	148.7	108	113.99	115.4	117.32	113.04	95.79	156.89	113.36	100.53	76.23	150.22	161.33	68.5	108.22	122.68
bta-miR-744	164.14	165.55	132.5	398.69	203.2	242.26	253.43	195.46	188.1	154.18	235.81	246.94	412.18	360.33	353.91	357.68	198.86	180.08	232.94	204.02	192.54	274.65	265.98	301.93	465.02	344.37	428.23	246.77	215.87	242.35	211.96	201.32	242.54	255.73	408.12	301.98	287.42	271.85	260.24	251.22	273.05	307.58	364.2	161.45	358.38
bta-miR-760-3p	22.64	33.91	38.28	53.07	52.67	57.08	95.96	52.32	37.96	44.31	61.84	45.29	82.57	46.17	93.73	90.79	43.46	36.94	52.79	36.73	55.19	57.58	74.46	55.64	92.21	57.22	56.96	60.79	61.31	55.38	35.93	55.76	64.6	57.58	82.86	47.62	62.49	59.61	69.44	35	64.65	65.3	59.03	36.37	85.74
bta-miR-769	150.8	182.94	179.48	283.1	240.18	196.49	263.88	223.13	131.92	185.97	253.76	203.15	328.67	254.75	307.51	310.83	172.08	159.66	313.97	129.81	213.93	218.47	312.65	260.13	354.9	265.13	281.62	206.14	190.96	214.15	203.43	248.68	352.07	212.21	352.22	249.61	216.75	175.38	273.53	476.33	245.29	215.96	312.97	224.43	261.07
bta-miR-874	216.69	204.88	147.41	258.4	217.48	190.65	227.59	207.79	164.37	135.3	191.52	184.99	443.9	233.6	273.35	327.6	172.52	162.55	180.52	143.21	202.38	165.3	229.3	212.62	306.48	342.09	391.84	254.59	244.6	212.47	148.19	129.98	223.75	244.38	255.26	305.26	305.35	304.58	385.84	166.24	180.26	248.89	173.75	137.5	301.59
bta-miR-877	40.02	95.46	186.94	116.17	154.27	155.61	318.01	236.66	80.48	118.02	242.99	101.25	143.69	152.23	270.84	251.22	94.38	56	273.73	87.12	131.57	138.37	328.58	253.22	312.45	146.13	229.93	266.63	182.02	257.45	126.19	227.15	312.43	199.24	303.74	105.1	248.13	226.37	231.56	352.65	133.48	180.46	216.07	252.82	316.75
bta-miR-92a	18983.4	11157.1	37356.8	22014.4	28963.1	28371.8	34078.9	20832	33063.7	22968.8	22238.1	25090.2	27438.5	21820.5	19714.8	26115	20882.5	22220.3	24350.8	36126.3	28738.1	24880.9	25844.5	19394.8	25214.3	30063.4	21425.5	24124.7	20474.9	21791.2	23273.8	31779.5	20126.6	26643.4	20725.6	30018.5	26832.1	25749	15918.6	24384.4	27172.2	29843.4	17180.5	28092	27501.3
bta-miR-92b	612.08	463.04	767.14	861.06	966.35	874.49	1126.28	887.4	941.64	615.52	729.16	953.36	579.19	599.74	714.71	652.11	701.92	577.87	792.39	1382.99	695.71	748.97	642.71	801.15	649.44	743.67	575.36	697.87	753.93	827.06	707.72	997.59	724.1	612.03	525.86	798.64	859.88	717.01	503.58	933.24	1079.65	1485.82	534.61	1051.19	666.59
bta-miR-93	961.78	1703.42	2902.01	1931.51	2583.72	2642.48	2458	1383.57	1839.05	2682.63	2087.74	2305.32	2278.98	2442.69	1729.73	1941.37	1889.79	3067.89	2261.27	1953.36	2396.27	2531.32	2785.71	1893.11	2446.17	2056.41	2168.03	2198.93	1732.99	1658.49	2530.24	2302.08	1856.65	2264.03	2955.28	2176.06	1866.89	1908.12	1918.61	4988.59	1637.92	1653.4	1910.67	1748.43	2636.85
bta-miR-98	131.8	53.86	133.49	369.74	237.37	169.74	207.6	114.87	85.03	106.89	82.99	118.98	430.14	248.45	161.44	429.33	93.5	85.62	106.32	95.06	276.19	115.15	185.59	140.74	177.78	125.04	142.39	134.22	89.09	180.92	128.88	90.82	128.61	271.95	355.19	276.07	164.28	78.21	127.71	162.53	205.36	89.22	147.02	117.09	176.98
bta-miR-99a-5p	294.72	435.4	147.41	196.64	214.2	201.38	300.48	376.19	182.22	143.05	167.78	269.79	192.44	226.66	300.62	201.99	219.93	213.1	112.04	174.74	137.13	121.66	239.3	283.89	155.23	143.98	296.12	204.03	227.68	207.77	98.79	94.51	149.75	103	105.86	135.21	178.25	180.2	304.32	184.19	107.24	160.78	154.26	127.74	124.61
bta-miR-99b	884.16	1093.06	539.93	612.89	912.04	719.07	672.01	847.4	503.18	482.21	670.11	660.71	794.49	702.73	912.82	575.54	647.05	545.53	447.6	501.12	503.17	525.86	730.88	656.8	448.77	452.22	724.87	647.91	860.27	935.81	357	300.75	576.11	305.75	325.75	380.44	683.21	674.29	912.06	495.17	319.44	570.63	432.14	483.46	429.51
hsa-miR-210-3p	236.5	380.12	248.59	321.31	438.23	309.52	215.29	348.82	229.29	280.74	440.89	350.54	433.4	369.2	535.09	301.9	398.15	207.15	375.43	258.13	300.79	326.43	390.81	343.74	340.31	195.55	347.8	467.05	430.45	401.78	282.91	225.51	380.55	244.92	298.05	198.16	328.29	349.37	446.82	366.15	273.05	387.23	447.74	306.04	365.55
hsa-miR-4532	789.96	426.28	318.69	66.58	112.83	144.49	90.11	98.33	145.01	215.77	344.53	117.27	131.33	89.92	172.41	108.84	236.17	112.17	142.13	78.18	141.41	146.96	98.91	69.77	259.38	387.35	323.02	478.49	273.34	207.1	125.51	82.21	450.43	246.54	218.16	385.91	243.38	819.34	384.02	116.41	165.05	116.81	174.86	314.91	567.62

## Sheet: Diff. expression analysis
Relative abundance (in RPMM), and differential expression analysis for 178 unique miRNAs in plasma samples of Pregnant heifers (P16 = Day 16, P24 = Day 24) vs Non-Pregnant heifers (NP = mean expression across Days 0, 8 and 16 of the oestrous cycle) determined by Illumina sequencing.
Highlighted in red: P < 0.05; FDR < 0.1
NP16 = Non-pregnant Day 16, used in the NP16 vs P16 comparison
miRNA	Mean expression (RPMM)				NP vs P16			NP vs P24			NP16 vs P16
	NP	NP16	P16	P24	Fold change	P-value	FDR	Fold change	P-value	FDR	Fold change	P-value	FDR
bta-let-7a-3p	77.3654	68.2863	71.568	72.6527	0.925064	0.451795	0.971848	0.939085	0.523369	0.987665	1.04806	0.541984	0.847433
bta-let-7a-5p	1105.74	990.251	914.268	1002.17	0.826836	0.293711	0.971848	0.906331	0.576747	0.987665	0.923269	0.890078	0.96606
bta-let-7b	754.509	739.233	728.904	786.465	0.966064	0.737623	0.98405	1.04235	0.977318	0.987665	0.986028	0.863335	0.958002
bta-let-7c	243.499	233.954	220.327	267.599	0.904838	0.432536	0.971848	1.09898	0.888129	0.987665	0.941755	0.925036	0.974298
bta-let-7d	476.6	346.787	378.857	418.505	0.794915	0.294267	0.971848	0.878104	0.53248	0.987665	1.09248	0.471391	0.847433
bta-let-7f	3244.58	2371.72	2279.41	2749.28	0.702528	0.247454	0.971848	0.847346	0.626949	0.987665	0.961077	0.87189	0.958002
bta-let-7g	1736.43	1631.84	1737.22	1911.2	1.00046	0.951939	0.988626	1.10065	0.648403	0.987665	1.06457	0.560869	0.847433
bta-let-7i	1625.35	1425.49	1508.88	1719.39	0.928338	0.537828	0.971848	1.05785	0.984012	0.987665	1.0585	0.506693	0.847433
bta-miR-100	327.685	273.12	252.232	267.655	0.769739	0.0574185	0.929136	0.816807	0.122644	0.987665	0.923521	0.586918	0.847433
bta-miR-101	9039.45	10279.6	8033.2	8146.83	0.888682	0.3379	0.971848	0.901253	0.378397	0.987665	0.781468	0.0445131	0.746302
bta-miR-103	6880.76	6236.16	5689.68	6221.95	0.826897	0.0366462	0.929136	0.904253	0.203416	0.987665	0.912368	0.331929	0.847433
bta-miR-106b	500.952	536.531	516.328	509.412	1.03069	0.661402	0.971848	1.01689	0.908017	0.987665	0.962345	0.743864	0.933474
bta-miR-107	3249.95	2963.44	2670.72	2922.08	0.821773	0.0356965	0.929136	0.899116	0.186593	0.987665	0.901225	0.30349	0.847433
bta-miR-10a	4898.51	4754.77	5230.59	5244.1	1.06779	0.341505	0.971848	1.07055	0.405643	0.987665	1.10007	0.167615	0.746302
bta-miR-10b	22948	22457	20782.2	19378.4	0.905622	0.203457	0.971848	0.844451	0.0370214	0.987665	0.92542	0.305636	0.847433
bta-miR-1246	440.483	374.52	528.399	576.537	1.19959	0.526306	0.971848	1.30888	0.293767	0.987665	1.41087	0.277713	0.847433
bta-miR-125a	511.434	459.528	475.787	398.03	0.9303	0.501292	0.971848	0.778263	0.0885741	0.987665	1.03538	0.865463	0.958002
bta-miR-125b	213.718	162.941	174.278	152.577	0.815458	0.16853	0.971848	0.713919	0.0244454	0.987665	1.06958	0.770903	0.933474
bta-miR-126-3p	490.231	538.308	508.132	436.946	1.03652	0.873482	0.98405	0.891307	0.268893	0.987665	0.943944	0.827646	0.945968
bta-miR-126-5p	4599.61	4960.73	4629.02	4443.16	1.00639	0.990993	0.996592	0.965985	0.730519	0.987665	0.933132	0.644876	0.871354
bta-miR-127	758.633	662.225	665.519	715.234	0.87726	0.129943	0.971848	0.942792	0.404106	0.987665	1.00497	0.999753	0.999753
bta-miR-128	2490.18	2328.74	2662.27	2883	1.06911	0.547008	0.971848	1.15775	0.251526	0.987665	1.14323	0.207838	0.746302
bta-miR-1296	38.8892	39.1587	43.07	42.7	1.10751	0.261881	0.971848	1.09799	0.342034	0.987665	1.09988	0.305398	0.847433
bta-miR-1307	284.373	270.632	312.901	298.41	1.10032	0.418747	0.971848	1.04936	0.572899	0.987665	1.15618	0.213912	0.746594
bta-miR-130a	390.812	371.434	373.346	401.956	0.955309	0.55675	0.971848	1.02852	0.811124	0.987665	1.00515	0.961626	0.978111
bta-miR-130b	696.779	609.886	813.381	875.483	1.16734	0.210182	0.971848	1.25647	0.111676	0.987665	1.33366	0.0188723	0.746302
bta-miR-133a	439.538	241.368	59.792	185.784	0.136034	0.000713908	0.127076	0.422679	0.0284399	0.987665	0.247722	0.13247	0.746302
bta-miR-1343-3p	78.4708	69.2188	88.062	91.1591	1.12223	0.31324	0.971848	1.16169	0.703696	0.987665	1.27223	0.0543373	0.746302
bta-miR-138	185.157	166.439	244.446	209.546	1.32021	0.249809	0.971848	1.13172	0.503416	0.987665	1.46868	0.101895	0.746302
bta-miR-1388-3p	145.224	130.218	150.28	153.11	1.03481	0.811271	0.98405	1.0543	0.983765	0.987665	1.15407	0.461848	0.847433
bta-miR-1388-5p	133.286	129.748	126.472	131.249	0.948878	0.48177	0.971848	0.984719	0.648593	0.987665	0.974755	0.954289	0.976227
bta-miR-139	50.9271	42.5638	47.149	45.1273	0.925814	0.429199	0.971848	0.886115	0.260836	0.987665	1.10773	0.565594	0.847433
bta-miR-140	11231.6	11192.1	11825.8	12364.6	1.0529	0.796814	0.98405	1.10088	0.395291	0.987665	1.05662	0.728059	0.933474
bta-miR-141	1184.29	1200.83	1396.29	1266.44	1.17901	0.65014	0.971848	1.06936	0.853659	0.987665	1.16277	0.524111	0.847433
bta-miR-142-3p	412.548	333.072	429.602	481.326	1.04134	0.864562	0.98405	1.16672	0.657831	0.987665	1.28982	0.194554	0.746302
bta-miR-142-5p	20987.8	20385.7	18631.1	20386	0.887714	0.203474	0.971848	0.971327	0.681414	0.987665	0.913933	0.375812	0.847433
bta-miR-143	7549.29	6130.1	7039.81	6983.11	0.932513	0.822688	0.98405	0.925003	0.725708	0.987665	1.1484	0.387666	0.847433
bta-miR-144	136.713	153.16	128.349	117.701	0.938824	0.571459	0.971848	0.860937	0.271972	0.987665	0.838006	0.156337	0.746302
bta-miR-1468	1082.43	1157.13	1119.6	995.105	1.03434	0.936544	0.988626	0.919321	0.324217	0.987665	0.96757	0.658245	0.880399
bta-miR-146a	129.278	130.691	125.897	136.661	0.973845	0.838512	0.98405	1.05711	0.75092	0.987665	0.963316	0.88873	0.96606
bta-miR-146b	38.6612	45.8875	36.047	40.18	0.932381	0.441213	0.971848	1.03928	0.817501	0.987665	0.785552	0.086237	0.746302
bta-miR-147	41.1088	32.0887	43.863	41.6927	1.067	0.866921	0.98405	1.01421	0.917762	0.987665	1.36693	0.116687	0.746302
bta-miR-148a	10033.9	8482.41	9768.64	9925.12	0.973567	0.628928	0.971848	0.989162	0.736802	0.987665	1.15164	0.446385	0.847433
bta-miR-148b	208.541	182.526	204.651	208.157	0.981345	0.698904	0.98405	0.998159	0.837487	0.987665	1.12121	0.462424	0.847433
bta-miR-149-5p	53.5621	51.2	68.726	71.3936	1.28311	0.255039	0.971848	1.33291	0.283927	0.987665	1.3423	0.162579	0.746302
bta-miR-150	6395.75	6914.07	6355.94	5078.6	0.993776	0.955301	0.988626	0.794058	0.213861	0.987665	0.919276	0.922588	0.974298
bta-miR-151-3p	4550.99	4125.69	4320.56	4654.06	0.949367	0.592922	0.971848	1.02265	0.946828	0.987665	1.04723	0.814625	0.941579
bta-miR-151-5p	794.074	584.717	655.347	699.575	0.825297	0.350086	0.971848	0.880995	0.523817	0.987665	1.12079	0.494893	0.847433
bta-miR-152	721.903	630.077	558.382	612.949	0.773486	0.0483943	0.929136	0.849074	0.148189	0.987665	0.886212	0.439478	0.847433
bta-miR-154c	62.2104	54.1562	59.369	58.9645	0.954326	0.489262	0.971848	0.947824	0.455337	0.987665	1.09625	0.646173	0.871354
bta-miR-155	187.662	148.244	171.4	236.73	0.913346	0.780005	0.98405	1.26147	0.606635	0.987665	1.1562	0.36946	0.847433
bta-miR-15a	1621.66	1657.17	1579.56	1622.14	0.974041	0.768375	0.98405	1.0003	0.778745	0.987665	0.953167	0.539571	0.847433
bta-miR-15b	148.204	147.436	151.906	157.095	1.02498	0.708578	0.98405	1.05999	0.957562	0.987665	1.03032	0.628616	0.867126
bta-miR-16a	948.315	1005.1	962.966	992.104	1.01545	0.841814	0.98405	1.04617	0.987665	0.987665	0.958076	0.766497	0.933474
bta-miR-16b	5896.92	6515.45	5670.66	5805.93	0.961632	0.617106	0.971848	0.984571	0.703392	0.987665	0.870341	0.204534	0.746302
bta-miR-17-5p	234.242	218.579	264.032	278.531	1.12718	0.387501	0.971848	1.18907	0.1948	0.987665	1.20795	0.144231	0.746302
bta-miR-181a	10161.3	9167.3	8933.63	11843.2	0.879182	0.216183	0.971848	1.16552	0.693458	0.987665	0.974511	0.939549	0.976227
bta-miR-181b	879.647	764.933	797.751	1043.7	0.906899	0.387844	0.971848	1.1865	0.565384	0.987665	1.0429	0.691549	0.907621
bta-miR-181c	165.803	137.705	156.927	232.607	0.946467	0.81511	0.98405	1.40291	0.479726	0.987665	1.13959	0.353852	0.847433
bta-miR-182	42.815	39.7662	38.792	88.2209	0.906038	0.255775	0.971848	2.06051	0.779137	0.987665	0.975501	0.946817	0.976227
bta-miR-1839	107.025	102.816	107.657	113.419	1.0059	0.840505	0.98405	1.05974	0.804207	0.987665	1.04708	0.549595	0.847433
bta-miR-186	9489.12	8693.53	10361.8	10792.6	1.09197	0.393888	0.971848	1.13737	0.367291	0.987665	1.1919	0.105003	0.746302
bta-miR-18a	45.8562	42.8925	50.247	51.2036	1.09575	0.400014	0.971848	1.11661	0.529533	0.987665	1.17146	0.132845	0.746302
bta-miR-191	29902.4	27911.7	33203.6	35260.2	1.1104	0.600248	0.971848	1.17918	0.215683	0.987665	1.18959	0.325063	0.847433
bta-miR-192	36985.6	34035.9	35548	36072.1	0.96113	0.569174	0.971848	0.975302	0.638384	0.987665	1.04443	0.765499	0.933474
bta-miR-193b	114.03	95.7825	84.836	93.9064	0.743977	0.0206504	0.929136	0.82352	0.142287	0.987665	0.885715	0.284252	0.847433
bta-miR-194	155.61	132.769	161.325	159.604	1.03672	0.760106	0.98405	1.02566	0.80843	0.987665	1.21508	0.567112	0.847433
bta-miR-195	36.5688	34.9438	41.66	39.3173	1.13922	0.503628	0.971848	1.07516	0.881724	0.987665	1.1922	0.312661	0.847433
bta-miR-197	77.4621	73.9587	78.191	78.6155	1.00941	0.927688	0.988626	1.01489	0.715349	0.987665	1.05722	0.549522	0.847433
bta-miR-199a-3p	1901.57	1807.59	1686.2	2035.31	0.886744	0.200273	0.971848	1.07034	0.936228	0.987665	0.932845	0.416213	0.847433
bta-miR-199a-5p	155.99	117.271	145.647	136.579	0.933694	0.45565	0.971848	0.875563	0.254644	0.987665	1.24197	0.473086	0.847433
bta-miR-199b	97.8721	93.6063	95.789	90.2364	0.978716	0.907169	0.988626	0.921983	0.477262	0.987665	1.02332	0.807664	0.939636
bta-miR-199c	2212.88	1960.04	2203.64	2158.39	0.995824	0.78018	0.98405	0.975376	0.558813	0.987665	1.12428	0.418913	0.847433
bta-miR-19a	175.292	165.63	202.581	196.704	1.15567	0.135079	0.971848	1.12215	0.687385	0.987665	1.22309	0.0287891	0.746302
bta-miR-19b	588.518	566.384	647.761	668.558	1.10067	0.304057	0.971848	1.136	0.800591	0.987665	1.14368	0.141239	0.746302
bta-miR-200a	310.775	307.154	347.749	316.105	1.11898	0.666098	0.971848	1.01715	0.897762	0.987665	1.13217	0.478633	0.847433
bta-miR-204	111.724	93.5813	127.208	135.608	1.13859	0.549437	0.971848	1.21378	0.754405	0.987665	1.35933	0.148915	0.746302
bta-miR-205	573.229	501.185	512.556	571.982	0.894156	0.329492	0.971848	0.997825	0.615604	0.987665	1.02269	0.898695	0.969502
bta-miR-20a	114.347	110.92	124.438	131.612	1.08825	0.417247	0.971848	1.15099	0.413721	0.987665	1.12187	0.264899	0.847433
bta-miR-21-3p	400.958	357.764	416.175	453.229	1.03795	0.97743	0.992503	1.13036	0.42972	0.987665	1.16327	0.430475	0.847433
bta-miR-214	50.8612	45.2612	54.246	50.3482	1.06655	0.998835	0.998835	0.989912	0.662716	0.987665	1.19851	0.392744	0.847433
bta-miR-215	9932.6	10232	13747	11799.4	1.38403	0.171858	0.971848	1.18795	0.265931	0.987665	1.34353	0.168068	0.746302
bta-miR-21-5p	11064.6	9609.09	11538.1	12487.3	1.04279	0.679557	0.983425	1.12859	0.368592	0.987665	1.20075	0.10576	0.746302
bta-miR-221	2411.03	1979.09	2382.6	2494.22	0.988207	0.89239	0.988626	1.0345	0.859655	0.987665	1.20388	0.208377	0.746302
bta-miR-222	671.692	563.388	698.264	633.977	1.03956	0.846131	0.98405	0.943851	0.735425	0.987665	1.2394	0.207821	0.746302
bta-miR-223	1209.16	1033.52	1340.58	1215.17	1.10869	0.522555	0.971848	1.00498	0.960401	0.987665	1.2971	0.0807492	0.746302
bta-miR-22-3p	75029.6	65735.7	77500.6	78035.2	1.03293	0.787428	0.98405	1.04006	0.705918	0.987665	1.17897	0.107734	0.746302
bta-miR-224	62.5179	55.84	64.773	63.5464	1.03607	0.981351	0.992503	1.01645	0.903689	0.987665	1.15997	0.373376	0.847433
bta-miR-22-5p	93.5937	83.4862	87.963	85.2136	0.939838	0.404726	0.971848	0.910463	0.220312	0.987665	1.05362	0.797931	0.937468
bta-miR-2284aa	465.654	403.404	469.532	525.794	1.00833	0.944677	0.988626	1.12915	0.48703	0.987665	1.16393	0.360649	0.847433
bta-miR-2284ab	63.5604	57.7562	68.274	70.6345	1.07416	0.574229	0.971848	1.1113	0.650032	0.987665	1.18211	0.209636	0.746302
bta-miR-2284w	53.5667	52.7963	61.09	61.0064	1.14045	0.341111	0.971848	1.13889	0.537587	0.987665	1.15709	0.29662	0.847433
bta-miR-2284x	1372.73	1323.28	1410.33	1463.6	1.02738	0.765915	0.98405	1.0662	0.72112	0.987665	1.06578	0.466987	0.847433
bta-miR-2284y	1408.95	1356.62	1417.83	1508.42	1.0063	0.930554	0.988626	1.0706	0.703624	0.987665	1.04512	0.553573	0.847433
bta-miR-2284z	431.867	372.938	436.969	490.53	1.01181	0.925624	0.988626	1.13584	0.461919	0.987665	1.17169	0.340492	0.847433
bta-miR-2285k	103.307	89.28	96.97	107.245	0.938662	0.614663	0.971848	1.03813	0.886609	0.987665	1.08613	0.476882	0.847433
bta-miR-2285t	39.5263	31.5475	37.779	36.6482	0.955795	0.871845	0.98405	0.927186	0.829296	0.987665	1.19753	0.328704	0.847433
bta-miR-2285y	112.724	102.411	108.704	116.755	0.96434	0.820306	0.98405	1.03577	0.933897	0.987665	1.06145	0.716471	0.93089
bta-miR-23a	2278.41	1987.68	2175.77	2151.01	0.95495	0.607994	0.971848	0.944081	0.531013	0.987665	1.09463	0.392553	0.847433
bta-miR-23b-3p	1341.96	1179.41	1213.15	1248.58	0.904017	0.310183	0.971848	0.930414	0.427221	0.987665	1.02861	0.835544	0.947304
bta-miR-2419-5p	455.274	498.315	603.475	587.522	1.32552	0.216835	0.971848	1.29048	0.283723	0.987665	1.21103	0.343593	0.847433
bta-miR-24-3p	382.843	354.781	370.885	378.065	0.968767	0.602245	0.971848	0.987522	0.808036	0.987665	1.04539	0.741313	0.933474
bta-miR-25	11768.6	12578.7	10147.4	10579	0.862247	0.0940178	0.971848	0.898917	0.253587	0.987665	0.806713	0.0140399	0.746302
bta-miR-26a	6934.26	5021.96	5499.46	6644.51	0.793085	0.368053	0.971848	0.958215	0.822542	0.987665	1.09508	0.516738	0.847433
bta-miR-26b	2080.16	1635.47	2104.67	2332.23	1.01178	0.800572	0.98405	1.12118	0.545435	0.987665	1.28689	0.124054	0.746302
bta-miR-26c	5799.3	4095.91	4391.14	5385.06	0.757184	0.309994	0.971848	0.92857	0.747779	0.987665	1.07208	0.601609	0.849892
bta-miR-27a-3p	5684.94	4929.93	5120.09	5019.84	0.900642	0.269916	0.971848	0.883008	0.126513	0.987665	1.03857	0.851141	0.958002
bta-miR-27b	19218.9	17831.3	19048.9	20545	0.991154	0.786523	0.98405	1.069	0.601718	0.987665	1.06829	0.578268	0.847433
bta-miR-28	147.075	115.525	135.796	167.458	0.923311	0.665932	0.971848	1.13859	0.726341	0.987665	1.17547	0.187113	0.746302
bta-miR-2957	715.847	624.098	552.894	606.414	0.772364	0.0477291	0.929136	0.847128	0.145858	0.987665	0.88591	0.441986	0.847433
bta-miR-296-3p	822.04	799.33	862.466	887.355	1.04918	0.598271	0.971848	1.07946	0.467462	0.987665	1.07899	0.422053	0.847433
bta-miR-29a	2100.86	1841.64	1883.28	1964.42	0.896433	0.328457	0.971848	0.935055	0.504369	0.987665	1.02261	0.76809	0.933474
bta-miR-29b	40.1321	36.125	38.649	38.1191	0.963045	0.601498	0.971848	0.949841	0.502291	0.987665	1.06987	0.611244	0.856704
bta-miR-29c	322.614	289.024	346.877	357.286	1.07521	0.641525	0.971848	1.10747	0.55494	0.987665	1.20017	0.175013	0.746302
bta-miR-301a	883.238	811.474	952.56	975.884	1.07849	0.654776	0.971848	1.10489	0.472483	0.987665	1.17386	0.265529	0.847433
bta-miR-301b	170.975	137.334	203.943	209.917	1.19283	0.353477	0.971848	1.22777	0.148569	0.987665	1.48502	0.0445418	0.746302
bta-miR-30a-5p	4888.58	4119.37	3809.7	4198.53	0.779307	0.146769	0.971848	0.858845	0.37183	0.987665	0.924826	0.593658	0.847433
bta-miR-30b-5p	610.498	516.675	719.494	776.904	1.17854	0.339351	0.971848	1.27257	0.188741	0.987665	1.39255	0.0763774	0.746302
bta-miR-30c	484.851	358.386	420.785	464.619	0.867864	0.523897	0.971848	0.958271	0.834247	0.987665	1.17411	0.278638	0.847433
bta-miR-30d	16100.6	14179.6	18914.3	19248.2	1.17476	0.35721	0.971848	1.19549	0.205253	0.987665	1.33391	0.0813927	0.746302
bta-miR-30e-5p	10781	10072.9	11763.2	12082.9	1.0911	0.455391	0.971848	1.12076	0.361375	0.987665	1.16781	0.153473	0.746302
bta-miR-32	221.847	216.691	196.48	224.062	0.885653	0.302107	0.971848	1.00998	0.772629	0.987665	0.906728	0.51243	0.847433
bta-miR-320a	2639.6	2633.55	2599.55	2764.73	0.984828	0.895413	0.988626	1.04741	0.571215	0.987665	0.987091	0.973213	0.98072
bta-miR-326	210.529	188.296	244.505	242.141	1.16139	0.367242	0.971848	1.15016	0.323209	0.987665	1.29851	0.0989292	0.746302
bta-miR-328	71.0721	64.6287	86.788	77.0509	1.22113	0.00331303	0.294859	1.08412	0.936396	0.987665	1.34287	0.00572376	0.512229
bta-miR-330	109.623	96.7937	113.119	115.055	1.03189	0.940892	0.988626	1.04956	0.78311	0.987665	1.16866	0.595108	0.847433
bta-miR-331-5p	42.0729	42.8725	41.459	41.0827	0.985408	0.840845	0.98405	0.976465	0.70488	0.987665	0.96703	0.7616	0.933474
bta-miR-335	41.1858	40.6537	44.331	38.8482	1.07637	0.659917	0.971848	0.943241	0.428683	0.987665	1.09045	0.514351	0.847433
bta-miR-339a	777.515	725.039	767.672	718.164	0.987341	0.909976	0.988626	0.923666	0.354925	0.987665	1.0588	0.415759	0.847433
bta-miR-339b	1112.59	1062.38	1080.88	1004.49	0.971501	0.732716	0.98405	0.902834	0.24458	0.987665	1.01742	0.662772	0.880399
bta-miR-342	1086.54	1064.42	1037.27	1032.89	0.954656	0.551339	0.971848	0.950624	0.45824	0.987665	0.97449	0.919986	0.974298
bta-miR-3431	39.97	36.1825	39.665	38.8464	0.992369	0.890219	0.988626	0.971888	0.695681	0.987665	1.09625	0.511184	0.847433
bta-miR-345-3p	120.708	103.698	142.642	135.165	1.18171	0.594794	0.971848	1.11977	0.489654	0.987665	1.37556	0.227167	0.774976
bta-miR-3596	589.522	569.094	571.412	614.001	0.96928	0.75422	0.98405	1.04152	0.975974	0.987665	1.00407	0.788416	0.937468
bta-miR-3604	1639.83	1544.44	1426.42	1737.76	0.869861	0.160326	0.971848	1.05972	0.961899	0.987665	0.923584	0.369792	0.847433
bta-miR-361	519.645	476.973	489.683	506.611	0.942341	0.503731	0.971848	0.974917	0.748269	0.987665	1.02665	0.869471	0.958002
bta-miR-365-3p	80.0062	67.0825	60.001	58.8682	0.749954	0.0262977	0.929136	0.735795	0.0132859	0.987665	0.894436	0.400987	0.847433
bta-miR-369-3p	58.7567	53.7913	55.178	53.9527	0.939093	0.43949	0.971848	0.91824	0.347694	0.987665	1.02578	0.944539	0.976227
bta-miR-374b	54.4158	44.6238	53.788	58.3373	0.988462	0.964481	0.990563	1.07206	0.807872	0.987665	1.20537	0.371144	0.847433
bta-miR-375	2196.94	2373.09	2524.56	2308.21	1.14912	0.162046	0.971848	1.05064	0.721981	0.987665	1.06383	0.440088	0.847433
bta-miR-378	1243.6	1195.33	1298.55	1337.83	1.04418	0.858646	0.98405	1.07577	0.968803	0.987665	1.08635	0.578743	0.847433
bta-miR-380-3p	63.8712	58.2625	62.151	65.11	0.973067	0.746556	0.98405	1.01939	0.955838	0.987665	1.06674	0.561556	0.847433
bta-miR-381	82.3496	68.2625	66.971	79.9482	0.813252	0.0547616	0.929136	0.970839	0.503276	0.987665	0.98108	0.829051	0.945968
bta-miR-410	116.054	107.174	105.789	117.223	0.911552	0.242182	0.971848	1.01007	0.921958	0.987665	0.987079	0.799577	0.937468
bta-miR-411a	71.45	68.01	63.439	73.9409	0.88788	0.198813	0.971848	1.03486	0.848611	0.987665	0.932789	0.470577	0.847433
bta-miR-421	1005.93	861.087	1184.69	1234.03	1.17771	0.399571	0.971848	1.22675	0.164351	0.987665	1.37581	0.0808819	0.746302
bta-miR-423-3p	11234.6	10632	10826.3	10604	0.963656	0.428575	0.971848	0.943875	0.334362	0.987665	1.01827	0.693463	0.907621
bta-miR-423-5p	25324.7	25547.1	25201.8	26099.3	0.995148	0.921006	0.988626	1.03058	0.756446	0.987665	0.986486	0.800535	0.937468
bta-miR-425-3p	103.203	95.2488	114.609	118.031	1.11053	0.373225	0.971848	1.14368	0.285081	0.987665	1.20326	0.168212	0.746302
bta-miR-425-5p	1714.74	1679.41	1791.89	1748.74	1.04499	0.626501	0.971848	1.01983	0.823428	0.987665	1.06697	0.44785	0.847433
bta-miR-429	110.607	109.182	121.988	107.217	1.1029	0.780432	0.98405	0.969356	0.624772	0.987665	1.11729	0.633294	0.867126
bta-miR-450b	98.7025	90.9425	119.679	107.981	1.21252	0.446079	0.971848	1.094	0.704654	0.987665	1.31599	0.202039	0.746302
bta-miR-451	11568	13712.6	10550.9	10087.6	0.912076	0.593808	0.971848	0.872029	0.371012	0.987665	0.769433	0.0642733	0.746302
bta-miR-455-5p	272.384	272.021	266.273	282.731	0.977566	0.636219	0.971848	1.03799	0.919866	0.987665	0.978868	0.777734	0.935383
bta-miR-484	600.345	659.425	554.826	500.215	0.924179	0.310928	0.971848	0.833212	0.0816402	0.987665	0.841378	0.20806	0.746302
bta-miR-486	159547	201697	137630	125500	0.862627	0.373856	0.971848	0.786602	0.16782	0.987665	0.68236	0.0894071	0.746302
bta-miR-497	157.718	135.232	186.967	174.316	1.18546	0.624081	0.971848	1.10524	0.933031	0.987665	1.38256	0.196451	0.746302
bta-miR-505	43.5175	39.9062	46.384	39.6318	1.06587	0.613238	0.971848	0.91071	0.313685	0.987665	1.16232	0.207611	0.746302
bta-miR-532	271.949	230.175	246.492	253.342	0.90639	0.228792	0.971848	0.931578	0.330456	0.987665	1.07089	0.508756	0.847433
bta-miR-6119-3p	42.6608	41.0487	42.083	38.9718	0.986455	0.968303	0.990563	0.913527	0.299104	0.987665	1.0252	0.581074	0.847433
bta-miR-6119-5p	199.155	163.692	182.578	190.346	0.916765	0.701738	0.98405	0.955772	0.828251	0.987665	1.11537	0.390387	0.847433
bta-miR-6529	2693.75	2553.07	3102.52	3098.07	1.15175	0.292753	0.971848	1.1501	0.339072	0.987665	1.21522	0.131248	0.746302
bta-miR-660	2137.1	1922.74	1988.3	2110.36	0.930373	0.369491	0.971848	0.987487	0.76401	0.987665	1.03409	0.746441	0.933474
bta-miR-665	79.8604	78.4588	80.113	76.5273	1.00316	0.771366	0.98405	0.958263	0.470354	0.987665	1.02108	0.950179	0.976227
bta-miR-669	133.964	120.134	120.692	115.163	0.90093	0.107596	0.971848	0.859656	0.102884	0.987665	1.00465	0.918953	0.974298
bta-miR-744	246.473	231.375	285.416	295.045	1.158	0.338997	0.971848	1.19706	0.131588	0.987665	1.23356	0.150527	0.746302
bta-miR-760-3p	55.0575	51.5987	59.774	60.7373	1.08566	0.434584	0.971848	1.10316	0.466974	0.987665	1.15844	0.196284	0.746302
bta-miR-769	228.219	222.588	252.929	273.049	1.10827	0.362798	0.971848	1.19643	0.181492	0.987665	1.13631	0.267651	0.847433
bta-miR-874	212.247	183.55	249.837	251.32	1.17711	0.355773	0.971848	1.18409	0.304497	0.987665	1.36114	0.0577551	0.746302
bta-miR-877	167.785	170.371	225.962	233.375	1.34674	0.0745401	0.971848	1.39092	0.0707048	0.987665	1.32629	0.088198	0.746302
bta-miR-92a	25110.2	25304.8	24491.7	24856.1	0.975369	0.701281	0.98405	0.989881	0.808333	0.987665	0.967871	0.752324	0.933474
bta-miR-92b	778.624	792.964	728.877	832.37	0.936109	0.434779	0.971848	1.06903	0.844607	0.987665	0.919181	0.542314	0.847433
bta-miR-93	2193.86	2347.34	2121.4	2309.17	0.966971	0.709388	0.98405	1.05256	0.961546	0.987665	0.903747	0.230751	0.774976
bta-miR-98	174.162	137.271	146.97	172.696	0.843869	0.479549	0.971848	0.991584	0.947035	0.987665	1.07065	0.588759	0.847433
bta-miR-99a-5p	223.032	187.724	168.086	160.242	0.753642	0.056696	0.929136	0.718471	0.0156551	0.987665	0.89539	0.471809	0.847433
bta-miR-99b	672.515	569.751	560.946	518.736	0.834102	0.115046	0.971848	0.771338	0.0223353	0.987665	0.984545	0.620989	0.863563
hsa-miR-210-3p	335.002	325.079	331.683	342.405	0.990091	0.713911	0.98405	1.0221	0.961662	0.987665	1.02032	0.97521	0.98072
hsa-miR-4532	183.252	128.213	283.337	318.77	1.54616	0.10218	0.971848	1.73952	0.0850099	0.987665	2.2099	0.00575538	0.512229
